# Supplementary material for: Global anthropogenic emissions of particulate matter including black carbon
Source: Copernicus journal article supplement (doi:10.5194/acp-17-8681-2017), 2017-07-17
Supplement: Supplementary file 1 [file acp-17-8681-2017-supplement.zip]

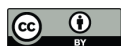

## *Supplement of*

# **Global anthropogenic emissions of particulate matter including black carbon**

**Zbigniew Klimont et al.**

*Correspondence to:* Zbigniew Klimont ([klimont@iiasa.ac.at](mailto:klimont@iiasa.ac.at))

- [acp-17-8681-2017-supplement-title-page.pdf](#)
- [ECLIPSE\\_V5a\\_key sectors by region.xlsx](#)
- [GAINS-regions.xlsx](#)
- [Klimont et al\\_Global PM\\_acp-2016-880\\_SI\\_rev.pdf.pdf](#)

The copyright of individual parts of the supplement might differ from the CC BY 3.0 License.
