# Supplementary material for: Global anthropogenic emissions of particulate matter including black carbon
Source: Copernicus journal article supplement (doi:10.5194/acp-17-8681-2017), 2017-07-17
Supplement: Supplementary file 1 [file ECLIPSE_V5a_key sectors by region.xlsx]

## Sheet: PM10
Region	Sector	1990	1995	2000	2005	2010
1 Canada	Power - coal	23.1607	21.6947	15.4228	16.8576	11.5468
1 Canada	Power - other fuels	1.46752	0.95504	1.43898	1.68336	1.03779
1 Canada	Industry	69.922	39.2608	30.4001	31.8256	26.6054
1 Canada	Coke ovens	3.29271	1.02205	0.71644	0.66359	0.65888
1 Canada	Fossil fuel production	11.2184	11.6356	11.1092	9.65819	10.6358
1 Canada	Residential-biomass	98.7944	103.654	109.971	107.92	123.638
1 Canada	Residential-coal	0.82581	0.92217	0.61985	0.57228	0.50545
1 Canada	Residential-other fuels	0.69574	0.60061	0.79556	1.30341	0.53539
1 Canada	Road transport - diesel	20.2245	24.0432	21.2149	20.571	18.5655
1 Canada	Road transport - other	14.899	18.5457	18.8346	17.0636	13.3892
1 Canada	Non-road transport - diesel	28.3187	30.1451	33.7616	27.9701	26.3135
1 Canada	Non-road transport - other	0.5728	0.73611	0.71663	0.89776	1.06445
1 Canada	Other	59.7527	61.4271	100.359	100.215	99.7911
1 Canada	Sum	333.145	314.642	345.361	337.202	334.287
2 USA	Power - coal	365.339	370.922	165.391	158.182	68.3895
2 USA	Power - other fuels	16.5777	10.8576	13.1801	14.8683	6.6008
2 USA	Industry	382.617	212.306	147.658	121.512	122.596
2 USA	Coke ovens	22.2476	6.7073	4.17137	3.0046	2.93573
2 USA	Fossil fuel production	166.551	163.866	156.076	154.244	145.539
2 USA	Residential-biomass	367.439	375.364	277.061	288.492	236.801
2 USA	Residential-coal	124.865	37.2402	28.0075	16.4576	9.14362
2 USA	Residential-other fuels	8.29102	5.47305	4.09618	4.37483	4.0857
2 USA	Road transport - diesel	215.575	254.74	244.878	243.308	149.84
2 USA	Road transport - other	157.723	168.043	165.198	153.981	131.54
2 USA	Non-road transport - diesel	167.843	115.318	111.501	123.254	105.446
2 USA	Non-road transport - other	28.6467	17.2733	16.4387	22.0767	15.9787
2 USA	Other	392.236	419.564	620.757	616.375	630.997
2 USA	Sum	2415.95	2157.67	1954.41	1920.13	1629.89
3 Mexico	Power - coal	3.68044	6.36221	6.06165	10.9696	11.3107
3 Mexico	Power - other fuels	7.63925	7.82784	11.7251	10.1604	8.00899
3 Mexico	Industry	197.013	157.516	181.883	105.048	102.284
3 Mexico	Coke ovens	7.57397	6.72754	5.58867	3.04498	3.807
3 Mexico	Fossil fuel production	2.84588	3.46983	4.84653	4.42813	6.82985
3 Mexico	Residential-biomass	155.895	157.516	160.69	150.24	146.522
3 Mexico	Residential-coal	0	0	0	0	0
3 Mexico	Residential-other fuels	5.81547	4.18468	2.98687	2.10925	1.14959
3 Mexico	Road transport - diesel	48.3312	47.073	46.6272	43.5839	42.2604
3 Mexico	Road transport - other	57.8071	59.2606	51.9515	52.9142	51.1296
3 Mexico	Non-road transport - diesel	13.4957	15.7556	17.357	18.1493	21.5355
3 Mexico	Non-road transport - other	0.61928	0.5082	1.19544	1.01558	1.03559
3 Mexico	Other	141.875	155.049	162.162	172.446	176.132
3 Mexico	Sum	642.59	621.251	653.075	574.109	572.005
4 Rest Central America	Power - coal	0.07508	0.13052	0.53174	0.6627	0.69445
4 Rest Central America	Power - other fuels	5.97132	6.1655	6.5029	7.59892	9.54069
4 Rest Central America	Industry	102.451	86.6851	81.8388	61.4675	44.9052
4 Rest Central America	Coke ovens	0	0	0	0	0
4 Rest Central America	Fossil fuel production	1.75188	1.81556	2.21206	2.52063	2.20813
4 Rest Central America	Residential-biomass	184.344	192.446	204.367	222.832	250.786
4 Rest Central America	Residential-coal	0.51934	0.97989	0.86508	0.85754	2.5938
4 Rest Central America	Residential-other fuels	1.8632	1.01597	1.20261	1.56829	0.94812
4 Rest Central America	Road transport - diesel	13.2954	19.7164	27.1099	30.0967	33.4624
4 Rest Central America	Road transport - other	14.0202	13.5409	10.2174	9.3096	6.09244
4 Rest Central America	Non-road transport - diesel	14.0969	10.2187	12.9879	11.0867	10.4814
4 Rest Central America	Non-road transport - other	0.16326	0.41331	0.60701	1.05066	1.37183
4 Rest Central America	Other	115.682	121.852	130.783	149.302	152.648
4 Rest Central America	Sum	454.234	454.98	479.226	498.352	515.733
5 Brazil	Power - coal	1.06894	1.29484	5.34823	7.8224	4.44729
5 Brazil	Power - other fuels	13.7782	16.1301	6.47654	6.52281	25.8457
5 Brazil	Industry	440.934	466.945	374.68	419.131	462.239
5 Brazil	Coke ovens	25.2571	27.1075	21.2263	16.3882	18.4615
5 Brazil	Fossil fuel production	3.45313	3.73593	5.2612	5.38162	6.11737
5 Brazil	Residential-biomass	241.08	188.622	192.81	244.486	230.68
5 Brazil	Residential-coal	1.63808	1.43706	1.23391	1.20038	1.43191
5 Brazil	Residential-other fuels	24.9078	21.0004	17.3256	13.7214	8.83823
5 Brazil	Road transport - diesel	93.8336	113.133	126.393	113.318	106.69
5 Brazil	Road transport - other	13.035	15.5092	16.4434	18.4115	23.2542
5 Brazil	Non-road transport - diesel	20.0214	25.3984	26.2133	29.9988	37.492
5 Brazil	Non-road transport - other	0.06932	0.07708	0.18413	0.17974	0.1552
5 Brazil	Other	349.179	414.325	456.517	508.176	530.468
5 Brazil	Sum	1228.26	1294.72	1250.11	1384.74	1456.12
6 Rest South America	Power - coal	5.64652	6.808	8.17363	7.27241	6.56417
6 Rest South America	Power - other fuels	4.06797	4.13001	4.43208	6.60584	8.99999
6 Rest South America	Industry	227.095	268.185	256.306	200.836	186.369
6 Rest South America	Coke ovens	6.1475	5.44342	6.56269	4.48583	8.93602
6 Rest South America	Fossil fuel production	12.9335	15.117	17.7486	22.1613	24.664
6 Rest South America	Residential-biomass	297.293	292.724	261.479	250.516	289.719
6 Rest South America	Residential-coal	5.70526	6.0837	2.01972	2.26217	1.83722
6 Rest South America	Residential-other fuels	4.08125	3.63564	3.142	2.55971	2.16686
6 Rest South America	Road transport - diesel	65.2586	91.5834	104.266	112.781	125.193
6 Rest South America	Road transport - other	62.9014	66.5932	37.5971	32.491	26.5801
6 Rest South America	Non-road transport - diesel	19.8092	28.7023	30.788	42.1664	50.2833
6 Rest South America	Non-road transport - other	0.87181	1.17896	0.90625	1.10281	1.39355
6 Rest South America	Other	306.542	364.921	405.064	445.57	459.389
6 Rest South America	Sum	1018.35	1155.11	1138.49	1130.81	1192.09
7 Northern Africa	Power - coal	1.3597	2.89059	3.86971	5.85629	4.00587
7 Northern Africa	Power - other fuels	4.54205	4.30628	4.40919	5.82453	8.05114
7 Northern Africa	Industry	571.299	691.479	836.812	584.183	600.418
7 Northern Africa	Coke ovens	6.01724	6.05623	4.66638	4.70267	4.79873
7 Northern Africa	Fossil fuel production	31.3207	36.5988	28.8087	25.1007	22.7995
7 Northern Africa	Residential-biomass	31.5011	35.3336	40.736	45.5645	49.1843
7 Northern Africa	Residential-coal	0	0	0	0.29127	0.27126
7 Northern Africa	Residential-other fuels	49.3161	29.7504	19.0027	11.671	4.34223
7 Northern Africa	Road transport - diesel	52.8054	69.6689	92.212	111.216	151.915
7 Northern Africa	Road transport - other	53.6728	52.7666	38.2821	33.2902	42.3705
7 Northern Africa	Non-road transport - diesel	13.0928	13.3192	15.5465	24.941	36.887
7 Northern Africa	Non-road transport - other	0.59542	0.89307	1.11603	1.48933	1.62439
7 Northern Africa	Other	206.037	208.8	269.48	289.584	267.335
7 Northern Africa	Sum	1021.56	1151.86	1354.94	1143.71	1194
8 Western Africa	Power - coal	4.56878	4.68979	4.18133	4.34705	2.95161
8 Western Africa	Power - other fuels	2.36275	2.6633	3.46429	4.69855	13.6107
8 Western Africa	Industry	296.844	374.129	417.67	348.403	372.371
8 Western Africa	Coke ovens	1.80136	1.69441	1.67926	0.95921	1.72863
8 Western Africa	Fossil fuel production	57.9896	71.9337	76.9383	67.039	53.6147
8 Western Africa	Residential-biomass	3122.07	3538.08	4091	4633.18	5234.39
8 Western Africa	Residential-coal	25.6973	26.9123	31.7387	33.2905	42.0889
8 Western Africa	Residential-other fuels	228.145	237.089	247.727	255.22	267.233
8 Western Africa	Road transport - diesel	35.7781	35.6743	50.7144	64.6704	85.0484
8 Western Africa	Road transport - other	59.2139	48.5828	45.7515	55.7086	53.425
8 Western Africa	Non-road transport - diesel	5.1409	6.53099	9.00223	9.93996	13.246
8 Western Africa	Non-road transport - other	0.31623	0.56247	1.45404	2.43059	0.57324
8 Western Africa	Other	552.7	644.775	849.795	945.264	1009.26
8 Western Africa	Sum	4392.63	4993.32	5831.12	6425.15	7149.55
10 South Africa	Power - coal	217.297	243.073	271.742	270.915	285.474
10 South Africa	Power - other fuels	1.05902	0.90124	1.11114	1.34704	1.40227
10 South Africa	Industry	105.225	109.186	86.9489	79.2108	79.9909
10 South Africa	Coke ovens	8.94441	7.13972	3.75874	2.83268	3.79151
10 South Africa	Fossil fuel production	27.475	32.3913	35.0542	38.8545	40.3246
10 South Africa	Residential-biomass	131.803	144.229	159.32	168.933	176.842
10 South Africa	Residential-coal	65.9914	74.4562	38.4589	115.043	76.2323
10 South Africa	Residential-other fuels	11.8966	10.2525	8.68569	7.63539	5.69495
10 South Africa	Road transport - diesel	17.2788	16.5861	21.3807	30.176	35.3929
10 South Africa	Road transport - other	15.3356	13.1866	8.39766	9.1643	6.16884
10 South Africa	Non-road transport - diesel	7.37071	9.22579	8.16186	7.70564	7.8594
10 South Africa	Non-road transport - other	0.23462	0.35407	0.4669	0.27363	0.20336
10 South Africa	Other	71.9035	77.4779	103.78	116.321	98.2322
10 South Africa	Sum	681.814	738.46	747.267	848.411	817.609
11 Western Europe	Power - coal	485.654	242.421	120.489	68.5249	37.7882
11 Western Europe	Power - other fuels	36.8272	42.7672	39.5873	37.4643	35.323
11 Western Europe	Industry	519.707	308.472	219.047	151.37	128.337
11 Western Europe	Coke ovens	18.4373	11.9916	7.16778	6.17829	4.30033
11 Western Europe	Fossil fuel production	77.6784	49.6088	40.3314	40.7058	32.473
11 Western Europe	Residential-biomass	410.181	393.027	344.495	318.208	317.364
11 Western Europe	Residential-coal	352.679	124.555	41.4811	28.4004	29.9792
11 Western Europe	Residential-other fuels	7.43811	7.63401	5.84178	5.15908	4.12629
11 Western Europe	Road transport - diesel	260.793	331.949	277.539	242.687	181.892
11 Western Europe	Road transport - other	88.3413	77.7742	87.3175	91.5769	96.3291
11 Western Europe	Non-road transport - diesel	160.102	144.835	134.55	121.329	91.8222
11 Western Europe	Non-road transport - other	14.9851	14.6058	11.7004	9.30838	7.69883
11 Western Europe	Other	861.211	708.738	701.519	626.145	609.551
11 Western Europe	Sum	3294.03	2458.38	2031.07	1747.06	1576.98
12 Central Europe	Power - coal	886.584	421.541	258.768	171.276	127.311
12 Central Europe	Power - other fuels	19.0787	10.9819	7.23526	6.91424	4.87278
12 Central Europe	Industry	703.926	272.964	190.857	94.2389	85.4435
12 Central Europe	Coke ovens	34.7352	22.2231	13.2594	5.9916	3.34739
12 Central Europe	Fossil fuel production	60.3913	47.4682	41.2862	33.242	30.7548
12 Central Europe	Residential-biomass	126.144	189.793	276.328	285.718	311.077
12 Central Europe	Residential-coal	724.702	328.48	147.82	157.53	198.244
12 Central Europe	Residential-other fuels	2.86706	1.23188	1.17195	1.23673	0.64114
12 Central Europe	Road transport - diesel	38.7636	34.2682	35.0055	43.4765	40.9451
12 Central Europe	Road transport - other	8.42456	7.14901	8.55774	10.1255	11.5396
12 Central Europe	Non-road transport - diesel	33.9648	25.8546	22.715	18.9675	19.104
12 Central Europe	Non-road transport - other	5.21764	1.92862	1.60878	1.53472	1.10398
12 Central Europe	Other	298.705	244.587	231.378	215.806	203.843
12 Central Europe	Sum	2943.5	1608.47	1235.99	1046.06	1038.23
13 Turkey	Power - coal	87.7253	44.6136	63.624	53.3348	76.8079
13 Turkey	Power - other fuels	0.49943	0.95241	1.09447	0.70802	0.44444
13 Turkey	Industry	591.27	389.269	163.484	143.748	147.294
13 Turkey	Coke ovens	10.7085	5.77847	4.75858	3.61441	2.48877
13 Turkey	Fossil fuel production	10.7855	12.1519	15.3463	11.089	14.3187
13 Turkey	Residential-biomass	141.777	133.467	115.311	93.3158	72.0354
13 Turkey	Residential-coal	59.96	49.687	40.9592	48.2955	125.265
13 Turkey	Residential-other fuels	1.29974	1.36977	0.69975	0.34579	0.18285
13 Turkey	Road transport - diesel	15.8259	17.9455	12.9093	12.308	13.1556
13 Turkey	Road transport - other	2.14226	2.80542	3.09248	2.60804	2.41545
13 Turkey	Non-road transport - diesel	10.5575	13.5591	14.3259	16.2378	20.8684
13 Turkey	Non-road transport - other	0.13473	0.01786	0.41604	0.37943	0.03303
13 Turkey	Other	74.7967	84.4526	89.1933	90.8584	95.4344
13 Turkey	Sum	1007.48	756.07	525.215	476.842	570.744
14 Ukraine+	Power - coal	239.189	140.457	86.749	76.8182	92.2217
14 Ukraine+	Power - other fuels	18.6056	5.43968	1.96564	1.2114	1.53893
14 Ukraine+	Industry	987.118	303.52	270.262	317.697	297.199
14 Ukraine+	Coke ovens	52.983	24.7808	23.3874	22.9133	19.5797
14 Ukraine+	Fossil fuel production	34.632	19.817	14.8552	13.8265	10.7702
14 Ukraine+	Residential-biomass	11.3275	12.7632	17.1217	18.209	33.7932
14 Ukraine+	Residential-coal	240.213	135.149	67.6445	59.7648	25.8577
14 Ukraine+	Residential-other fuels	3.34718	0.32522	0.09227	0.16559	0.13922
14 Ukraine+	Road transport - diesel	25.3117	12.9339	10.0188	9.30305	12.1486
14 Ukraine+	Road transport - other	9.90536	11.3757	9.65677	10.4961	10.0313
14 Ukraine+	Non-road transport - diesel	33.9901	18.4258	13.1697	14.4819	12.7811
14 Ukraine+	Non-road transport - other	6.58667	0.05484	0.12374	0.07796	0.032
14 Ukraine+	Other	190.473	171.469	163.977	161.603	163.329
14 Ukraine+	Sum	1853.68	856.511	679.024	706.568	679.422
15 Asia-Stan	Power - coal	55.8163	31.7298	26.6863	28.9945	28.1932
15 Asia-Stan	Power - other fuels	3.0333	1.88059	1.48543	1.44708	0.77517
15 Asia-Stan	Industry	500.621	101.294	60.3401	63.7424	63.9149
15 Asia-Stan	Coke ovens	1.11852	4.66614	5.75527	5.64016	5.73785
15 Asia-Stan	Fossil fuel production	31.3163	22.8425	25.343	30.894	24.2226
15 Asia-Stan	Residential-biomass	3.8076	2.67321	2.50344	0.56932	1.91206
15 Asia-Stan	Residential-coal	44.2854	7.50611	10.6021	5.79384	83.7399
15 Asia-Stan	Residential-other fuels	5.28023	2.20726	1.77153	2.22487	2.55589
15 Asia-Stan	Road transport - diesel	11.5494	4.0178	6.31832	5.91493	8.49805
15 Asia-Stan	Road transport - other	34.5441	29.0888	23.7148	25.3965	27.2725
15 Asia-Stan	Non-road transport - diesel	20.9181	14.0382	16.4461	15.6622	11.8016
15 Asia-Stan	Non-road transport - other	0	0	0.16564	0.13333	0.13157
15 Asia-Stan	Other	123.457	102.571	121.941	127.947	133.487
15 Asia-Stan	Sum	835.747	324.515	303.073	314.36	392.242
16 Russia+	Power - coal	831.626	604.498	629.993	578.698	466.652
16 Russia+	Power - other fuels	48.1377	30.2621	21.5517	17.2215	11.2063
16 Russia+	Industry	1754.86	508.842	517.562	570.299	634.485
16 Russia+	Coke ovens	114.381	48.4236	46.1147	43.2816	47.6252
16 Russia+	Fossil fuel production	229.764	135.617	137.749	176.126	123.244
16 Russia+	Residential-biomass	199.002	110.136	82.351	46.4078	39.1105
16 Russia+	Residential-coal	1707.53	299.522	207.308	207.744	169.314
16 Russia+	Residential-other fuels	7.0059	4.92365	2.52077	0.93161	1.21812
16 Russia+	Road transport - diesel	84.4844	29.499	44.1012	46.2704	46.9034
16 Russia+	Road transport - other	112.54	91.0376	83.0623	97.6993	97.8706
16 Russia+	Non-road transport - diesel	136.072	69.6952	46.6262	38.6144	32.2633
16 Russia+	Non-road transport - other	7.18074	2.01777	1.39804	1.16126	0.73642
16 Russia+	Other	600.13	499.054	493.281	491.822	490.776
16 Russia+	Sum	5832.71	2433.53	2313.62	2316.28	2161.41
17 Middle East	Power - coal	4.60129	6.82188	7.63733	6.71684	4.02141
17 Middle East	Power - other fuels	14.4219	21.5828	22.7604	26.8095	43.0617
17 Middle East	Industry	277.089	317.446	348.947	183.823	167.878
17 Middle East	Coke ovens	2.50665	3.47652	3.41707	2.36741	2.77383
17 Middle East	Fossil fuel production	63.4252	55.4813	68.7873	67.7812	66.9226
17 Middle East	Residential-biomass	10.3676	13.5353	11.1052	21.1034	18.5614
17 Middle East	Residential-coal	0	0.3346	0.32579	0.15614	0.15301
17 Middle East	Residential-other fuels	4.05572	4.129	4.41068	4.19734	2.24256
17 Middle East	Road transport - diesel	148.24	172.147	190.884	219.201	223.903
17 Middle East	Road transport - other	95.691	117.286	110.536	120.213	109.682
17 Middle East	Non-road transport - diesel	45.2473	46.2737	53.4838	65.179	71.1325
17 Middle East	Non-road transport - other	0.97599	0.65733	0.82433	0.58318	0.49206
17 Middle East	Other	169.739	194.438	231.891	243.8	285.264
17 Middle East	Sum	836.36	953.61	1055.01	961.93	996.088
18 India	Power - coal	809.608	1293.52	1429.46	1260.7	1160.88
18 India	Power - other fuels	7.28342	10.8992	17.0861	16.7527	28.0501
18 India	Industry	2157.55	2343.56	2551.8	1949.43	1917.98
18 India	Coke ovens	29.3887	24.907	21.6942	31.7073	48.005
18 India	Fossil fuel production	14.405	18.8603	22.4543	27.7752	35.7542
18 India	Residential-biomass	2418.21	2535.89	2364.81	2535.09	2733.95
18 India	Residential-coal	735.806	778.799	383.386	341.642	249.182
18 India	Residential-other fuels	309.706	325.465	319.348	296.334	284.447
18 India	Road transport - diesel	111.829	172.201	156.575	155.795	236.318
18 India	Road transport - other	109.132	106.841	111.972	59.5039	43.7171
18 India	Non-road transport - diesel	17.8105	21.8939	45.2874	46.8301	55.7839
18 India	Non-road transport - other	1.30644	0.86368	0.04301	0.04301	0.09074
18 India	Other	1115.18	1160.08	1236.15	1235.47	1273.06
18 India	Sum	7837.22	8793.78	8660.08	7957.08	8067.22
19 Korea	Power - coal	102.395	84.7786	60.9967	60.7138	54.3768
19 Korea	Power - other fuels	2.02202	3.92971	3.30926	3.44571	2.93702
19 Korea	Industry	567.584	385.541	358.581	269.118	248.052
19 Korea	Coke ovens	23.3481	5.6287	5.81283	4.76274	5.63905
19 Korea	Fossil fuel production	16.9076	12.6882	15.2653	17.8058	19.9854
19 Korea	Residential-biomass	190.787	199.324	199.291	203.027	197.971
19 Korea	Residential-coal	161.518	25.4638	10.5923	78.4962	70.9558
19 Korea	Residential-other fuels	4.13351	3.52957	2.09868	2.54605	2.43941
19 Korea	Road transport - diesel	39.7269	54.7383	41.0705	35.9812	23.3268
19 Korea	Road transport - other	7.6623	8.24604	8.56377	9.25629	8.91885
19 Korea	Non-road transport - diesel	11.8169	18.9129	18.4333	8.00614	6.43444
19 Korea	Non-road transport - other	0.43756	0.81297	1.12168	0.9349	1.07617
19 Korea	Other	85.9937	95.2047	104.723	107.639	111.606
19 Korea	Sum	1214.33	898.799	829.86	801.734	753.72
20 China+	Power - coal	1590.65	2111.4	2256.63	2396.71	2287.55
20 China+	Power - other fuels	24.095	30.2625	33.2019	39.156	42.3694
20 China+	Industry	3542.55	6320.87	6041.29	8355.25	8494.32
20 China+	Coke ovens	189.822	296.366	408.25	695.287	803.739
20 China+	Fossil fuel production	216.699	272.274	260.407	441.731	736.948
20 China+	Residential-biomass	4363.15	4416.07	4356.86	4032.39	3867.83
20 China+	Residential-coal	1951.56	1670.67	2347.19	2432.8	2571.72
20 China+	Residential-other fuels	22.0487	24.7834	27.55	32.3889	35.8949
20 China+	Road transport - diesel	31.1461	48.4208	171.924	266.719	377.481
20 China+	Road transport - other	77.4828	117.684	138.946	139.284	123.115
20 China+	Non-road transport - diesel	101.625	125.331	98.0287	154.762	159.507
20 China+	Non-road transport - other	2.32729	3.05947	2.09738	3.37949	3.73207
20 China+	Other	1947.9	2175.97	2064.37	2243.21	2476.7
20 China+	Sum	14061.1	17613.2	18206.7	21233.1	21980.9
21 Southeastern Asia	Power - coal	64.693	81.6066	105.686	122.17	148.492
21 Southeastern Asia	Power - other fuels	7.68749	10.5983	10.3058	6.67362	7.40575
21 Southeastern Asia	Industry	791.169	1286.22	1083.92	609.544	558.637
21 Southeastern Asia	Coke ovens	0	0	0	0	0
21 Southeastern Asia	Fossil fuel production	8.47654	11.5011	13.7411	19.2698	24.1765
21 Southeastern Asia	Residential-biomass	854.824	811.852	830.371	868.629	909.798
21 Southeastern Asia	Residential-coal	6.38761	13.1699	18.6277	25.2334	29.3129
21 Southeastern Asia	Residential-other fuels	103.041	75.5248	61.1911	52.324	41.5836
21 Southeastern Asia	Road transport - diesel	70.701	114.57	126.438	153.299	149.23
21 Southeastern Asia	Road transport - other	24.3981	34.7594	38.0573	42.3106	61.5072
21 Southeastern Asia	Non-road transport - diesel	24.4647	31.2098	42.8048	50.9962	56.4338
21 Southeastern Asia	Non-road transport - other	0.33001	0.63093	0.77416	1.41585	1.15725
21 Southeastern Asia	Other	334.403	383.03	451.332	498.703	537.925
21 Southeastern Asia	Sum	2290.58	2854.67	2783.25	2450.57	2525.66
22 Indonesia+	Power - coal	12.0213	16.0383	35.3755	49.9668	64.2992
22 Indonesia+	Power - other fuels	3.71665	4.81111	6.51681	11.2061	12.6148
22 Indonesia+	Industry	181.773	223.834	185.54	146.631	140.17
22 Indonesia+	Coke ovens	0	0	0	0	0
22 Indonesia+	Fossil fuel production	10.2714	14.0504	16.1239	20.8805	33.608
22 Indonesia+	Residential-biomass	765.885	817.977	871.292	942.015	1005.79
22 Indonesia+	Residential-coal	0.21222	0.72643	0.74927	0.674	0.65751
22 Indonesia+	Residential-other fuels	88.9857	84.4743	79.98	74.1475	59.7407
22 Indonesia+	Road transport - diesel	30.6779	45.5732	60.0048	49.7267	76.2699
22 Indonesia+	Road transport - other	9.96369	14.959	19.7429	25.7671	33.2617
22 Indonesia+	Non-road transport - diesel	12.0542	17.5162	23.5922	28.9316	29.8218
22 Indonesia+	Non-road transport - other	0.2859	0.59677	0.73927	0.69442	0.22245
22 Indonesia+	Other	267.442	335.814	372.874	417.216	446.336
22 Indonesia+	Sum	1383.29	1576.37	1672.53	1767.86	1902.79
23 Japan	Power - coal	35.7754	18.2903	12.1593	12.3559	10.4629
23 Japan	Power - other fuels	18.3737	15.2703	10.7997	12.1266	8.77784
23 Japan	Industry	203.662	110.796	56.0125	52.6096	50.3812
23 Japan	Coke ovens	10.0372	7.95253	6.41544	5.50661	5.71
23 Japan	Fossil fuel production	16.8463	18.3073	18.6957	21.5038	20.8519
23 Japan	Residential-biomass	2.30678	1.62663	0.99417	0.49473	0.47566
23 Japan	Residential-coal	9.96421	5.16347	5.19232	4.54481	4.39729
23 Japan	Residential-other fuels	1.83002	2.11069	1.83067	1.48015	0.93597
23 Japan	Road transport - diesel	79.921	92.7281	74.3124	51.3801	30.0931
23 Japan	Road transport - other	21.7688	22.6147	24.7167	22.6327	18.4671
23 Japan	Non-road transport - diesel	30.0065	32.1665	36.7238	31.0322	17.0975
23 Japan	Non-road transport - other	3.78086	4.18435	3.14879	2.20233	1.34323
23 Japan	Other	110.512	103.688	102.63	101.565	98.2973
23 Japan	Sum	544.785	434.899	353.631	319.434	267.291
24 Oceania	Power - coal	41.9908	40.4733	41.0008	45.4165	40.3346
24 Oceania	Power - other fuels	0.38993	0.27361	0.2868	0.60276	0.52001
24 Oceania	Industry	41.5277	34.583	22.9319	17.6201	16.2278
24 Oceania	Coke ovens	3.91707	1.43835	0.82693	0.79068	0.80666
24 Oceania	Fossil fuel production	25.7121	26.8045	28.2897	28.2109	29.9982
24 Oceania	Residential-biomass	51.0495	53.9759	50.0477	37.2653	33.2565
24 Oceania	Residential-coal	4.60293	2.84622	1.80763	2.15867	1.46461
24 Oceania	Residential-other fuels	0.08607	0.06125	0.05167	0.06782	0.05639
24 Oceania	Road transport - diesel	17.7907	18.468	20.1623	19.2787	17.8443
24 Oceania	Road transport - other	9.48604	9.05855	8.59411	8.47398	7.68431
24 Oceania	Non-road transport - diesel	13.6865	15.2934	17.9529	20.9444	20.7914
24 Oceania	Non-road transport - other	0.19193	0.17008	0.16994	0.33454	0.33572
24 Oceania	Other	84.245	99.7132	161.655	172.478	172.186
24 Oceania	Sum	294.676	303.159	353.777	353.642	341.506
25 Rest South Asia	Power - coal	0	0	0.6234	0.86727	1.42823
25 Rest South Asia	Power - other fuels	2.19525	3.92394	7.26439	8.57635	11.2243
25 Rest South Asia	Industry	283.406	325.907	429.867	407.218	396.089
25 Rest South Asia	Coke ovens	2.01068	1.29907	1.10857	1.08922	1.08533
25 Rest South Asia	Fossil fuel production	1.46031	1.75047	1.81873	2.63662	3.2414
25 Rest South Asia	Residential-biomass	877.348	954.183	1066.09	1155.86	1227.24
25 Rest South Asia	Residential-coal	32.7821	31.0207	73.5944	108.905	187.433
25 Rest South Asia	Residential-other fuels	125.866	112.088	103.059	93.6277	80.6955
25 Rest South Asia	Road transport - diesel	31.5632	48.5277	64.7997	67.6613	76.5451
25 Rest South Asia	Road transport - other	38.6908	37.7737	31.5841	34.2243	50.256
25 Rest South Asia	Non-road transport - diesel	7.51205	9.91677	11.3057	13.4313	11.0135
25 Rest South Asia	Non-road transport - other	0	0.0733	0.08104	0.2049	0.35906
25 Rest South Asia	Other	291.926	367.371	419.389	454.679	486.117
25 Rest South Asia	Sum	1694.76	1893.83	2210.59	2348.98	2532.73
Global	Power - coal	5870.52	5796.06	5616.6	5416.15	4996.21
Global	Power - other fuels	263.833	247.772	237.191	249.626	294.22
Global	Industry	15497.2	15638.8	14914.6	15284	15344.2
Global	Coke ovens	574.676	520.83	596.338	865.212	995.957
Global	Fossil fuel production	1134.31	1059.79	1058.55	1282.87	1520
Global	Residential-biomass	15056.4	15674.3	16086.4	16670.5	17508.7
Global	Residential-coal	6257.45	3621.12	3460.22	3672.11	3881.78
Global	Residential-other fuels	1022	962.86	916.582	867.341	811.893
Global	Road transport - diesel	1560.7	1870.21	2026.86	2148.72	2262.92
Global	Road transport - other	1098.78	1144.48	1100.79	1081.9	1056.02
Global	Non-road transport - diesel	949.017	859.536	860.765	940.617	926.2
Global	Non-road transport - other	75.8303	51.6703	47.4974	52.9045	41.9448
Global	Other	8752.02	9194.37	10045	10532.2	11008.2
Global	Total	58112.7	56641.8	56967.5	59064.1	60648.2

## Sheet: PM2.5
Region	Sector	1990	1995	2000	2005	2010
1 Canada	Power - coal	11.9326	11.7669	9.59413	10.4055	7.33018
1 Canada	Power - other fuels	1.0883	0.74105	1.15311	1.38433	0.92743
1 Canada	Industry	49.147	29.309	22.7863	24.3398	20.4266
1 Canada	Coke ovens	2.46476	0.69499	0.48527	0.4613	0.45802
1 Canada	Fossil fuel production	1.7741	2.02572	1.93112	1.60339	1.99746
1 Canada	Residential-biomass	95.7071	100.414	106.534	104.548	119.774
1 Canada	Residential-coal	0.78467	0.88992	0.58981	0.54252	0.46374
1 Canada	Residential-other fuels	0.45633	0.41248	0.49178	0.68026	0.32797
1 Canada	Road transport - diesel	17.5286	20.8736	17.7237	16.5181	13.4862
1 Canada	Road transport - other	12.5431	15.9045	16.0515	14.4965	10.8792
1 Canada	Non-road transport - diesel	26.9389	28.6875	32.1366	26.62	25.0581
1 Canada	Non-road transport - other	0.53526	0.68787	0.66967	0.83893	0.9947
1 Canada	Other	30.7588	31.6497	40.11	39.5804	38.797
1 Canada	Sum	251.66	244.058	250.258	242.019	240.921
2 USA	Power - coal	179.967	192.581	103.316	99.7966	48.8693
2 USA	Power - other fuels	13.4619	9.15739	10.498	12.193	5.98018
2 USA	Industry	219.977	137.95	97.1144	87.1383	88.9811
2 USA	Coke ovens	16.6534	4.56092	2.82541	2.08863	2.04076
2 USA	Fossil fuel production	18.7939	18.7661	18.3072	18.669	17.6193
2 USA	Residential-biomass	355.957	363.634	268.403	279.477	229.401
2 USA	Residential-coal	100.698	34.0127	25.9553	12.5873	6.69614
2 USA	Residential-other fuels	4.27095	3.22524	2.67352	2.63766	2.43395
2 USA	Road transport - diesel	186.6	221.47	206.645	197.846	106.933
2 USA	Road transport - other	129.607	137.58	132.762	121.519	99.1678
2 USA	Non-road transport - diesel	159.858	109.731	106.106	117.258	100.402
2 USA	Non-road transport - other	26.7695	16.1414	15.3614	20.63	14.9315
2 USA	Other	216.47	232.81	306.476	303.129	303.327
2 USA	Sum	1629.08	1481.62	1296.44	1274.97	1026.78
3 Mexico	Power - coal	1.42584	2.3422	2.3577	5.34753	5.97704
3 Mexico	Power - other fuels	5.64651	5.8097	8.98583	8.15227	6.70279
3 Mexico	Industry	129.074	123.788	144.078	85.1879	82.9705
3 Mexico	Coke ovens	6.05774	5.38718	4.63132	2.72718	3.49642
3 Mexico	Fossil fuel production	1.60496	1.66736	2.67636	1.57369	3.7081
3 Mexico	Residential-biomass	151.023	152.593	155.669	145.545	141.943
3 Mexico	Residential-coal	0	0	0	0	0
3 Mexico	Residential-other fuels	5.81322	4.18222	2.98355	2.10578	1.14547
3 Mexico	Road transport - diesel	43.9645	42.5634	42.5711	38.3684	36.0455
3 Mexico	Road transport - other	52.654	53.6076	48.6633	49.268	47.2979
3 Mexico	Non-road transport - diesel	12.9098	15.0821	16.6175	17.3747	20.6235
3 Mexico	Non-road transport - other	0.58424	0.47945	1.12781	0.95812	0.977
3 Mexico	Other	84.278	90.2926	96.0174	101.909	103.273
3 Mexico	Sum	495.036	497.795	526.378	458.517	454.16
4 Rest Central America	Power - coal	0.04717	0.06113	0.28097	0.29357	0.27997
4 Rest Central America	Power - other fuels	4.7811	4.84872	5.20586	6.17453	7.92743
4 Rest Central America	Industry	82.8201	68.6582	65.4664	48.9529	35.4404
4 Rest Central America	Coke ovens	0	0	0	0	0
4 Rest Central America	Fossil fuel production	1.75188	1.81556	2.21206	2.52063	2.20813
4 Rest Central America	Residential-biomass	178.583	186.432	197.981	215.868	242.949
4 Rest Central America	Residential-coal	0.44877	0.84672	0.74773	0.74058	2.24346
4 Rest Central America	Residential-other fuels	1.07926	0.72099	0.77212	0.89319	0.60771
4 Rest Central America	Road transport - diesel	12.355	18.3496	25.0524	27.4624	30.4443
4 Rest Central America	Road transport - other	13.0375	12.5229	9.2198	8.22894	5.11587
4 Rest Central America	Non-road transport - diesel	13.4914	9.78643	12.4396	10.6132	10.039
4 Rest Central America	Non-road transport - other	0.15378	0.38948	0.57185	0.99006	1.29247
4 Rest Central America	Other	86.4271	89.9781	95.8481	105.358	107.078
4 Rest Central America	Sum	394.977	394.41	415.798	428.096	445.626
5 Brazil	Power - coal	0.44925	0.49994	2.5864	2.90093	1.73725
5 Brazil	Power - other fuels	11.8376	13.9256	5.63399	5.7911	22.6558
5 Brazil	Industry	336.039	354.303	282.756	334.185	371.992
5 Brazil	Coke ovens	20.2009	21.7067	17.5902	14.6778	16.9554
5 Brazil	Fossil fuel production	1.1625	1.19078	2.21848	2.3996	1.93621
5 Brazil	Residential-biomass	233.546	182.727	186.785	236.846	223.472
5 Brazil	Residential-coal	1.41721	1.22736	1.06757	1.03859	1.23895
5 Brazil	Residential-other fuels	24.5724	20.5034	16.8765	13.5692	8.76802
5 Brazil	Road transport - diesel	88.0096	106.174	118.1	104.75	96.4808
5 Brazil	Road transport - other	10.7843	12.4951	13.0534	14.5435	17.906
5 Brazil	Non-road transport - diesel	19.1165	24.2585	25.0388	28.6393	35.7848
5 Brazil	Non-road transport - other	0.06498	0.07225	0.17258	0.16848	0.14547
5 Brazil	Other	190.847	234.872	261.559	294.486	299.199
5 Brazil	Sum	938.048	973.955	933.439	1053.99	1098.27
6 Rest South America	Power - coal	2.14814	2.85324	4.10537	3.61367	2.93965
6 Rest South America	Power - other fuels	3.32456	3.50046	3.77592	5.66717	7.73753
6 Rest South America	Industry	173.235	205.529	199.204	158.945	147.93
6 Rest South America	Coke ovens	4.91683	4.3589	5.43849	4.01766	8.20699
6 Rest South America	Fossil fuel production	7.23825	8.24295	7.4062	7.60739	7.48044
6 Rest South America	Residential-biomass	288.002	283.576	253.308	242.688	280.665
6 Rest South America	Residential-coal	4.94425	5.27741	1.75387	1.96321	1.60072
6 Rest South America	Residential-other fuels	3.7783	3.26277	2.78223	2.30898	1.81399
6 Rest South America	Road transport - diesel	60.5451	85.0236	96.3222	103.147	113.319
6 Rest South America	Road transport - other	57.9677	60.9241	33.4252	28.2113	21.8991
6 Rest South America	Non-road transport - diesel	18.9253	27.4379	29.4267	40.3053	48.0712
6 Rest South America	Non-road transport - other	0.8163	1.10684	0.84894	1.03449	1.30669
6 Rest South America	Other	199.454	242.1	271.271	301.933	305.899
6 Rest South America	Sum	825.296	933.193	909.068	901.443	948.869
7 Northern Africa	Power - coal	0.50161	1.03253	1.37449	2.20855	1.42033
7 Northern Africa	Power - other fuels	3.47448	3.36847	3.61068	4.86069	6.81959
7 Northern Africa	Industry	390.758	479.123	593.495	427.436	436.431
7 Northern Africa	Coke ovens	4.81265	4.84256	3.85927	4.20593	4.20825
7 Northern Africa	Fossil fuel production	30.739	35.9166	27.9236	24.0712	21.7814
7 Northern Africa	Residential-biomass	30.5167	34.2294	39.4629	44.1406	47.6473
7 Northern Africa	Residential-coal	0	0	0	0.25692	0.23468
7 Northern Africa	Residential-other fuels	49.3032	29.7139	18.9875	11.6157	4.24668
7 Northern Africa	Road transport - diesel	49.9521	65.802	86.8479	104.654	142.589
7 Northern Africa	Road transport - other	50.8453	49.9281	36.0862	31.075	39.4303
7 Northern Africa	Non-road transport - diesel	12.5924	12.8108	14.9532	23.9891	35.4766
7 Northern Africa	Non-road transport - other	0.56473	0.84704	1.0585	1.41256	1.54065
7 Northern Africa	Other	137.69	134.064	154.564	167.395	167.103
7 Northern Africa	Sum	761.751	851.679	982.223	847.322	908.929
8 Western Africa	Power - coal	1.71395	1.71956	1.50756	1.5216	1.04534
8 Western Africa	Power - other fuels	2.08855	2.34552	3.06641	4.17175	12.5762
8 Western Africa	Industry	227.868	284.947	322.585	279.502	298.618
8 Western Africa	Coke ovens	1.44075	1.35683	1.3916	0.8591	1.51834
8 Western Africa	Fossil fuel production	56.6647	70.7896	75.7882	65.9644	52.4136
8 Western Africa	Residential-biomass	3024.51	3427.51	3963.16	4488.39	5070.82
8 Western Africa	Residential-coal	21.1497	22.2509	26.2633	28.4014	35.2375
8 Western Africa	Residential-other fuels	228.052	237.017	247.694	255.19	267.201
8 Western Africa	Road transport - diesel	33.7543	33.4723	47.5306	59.9657	78.6544
8 Western Africa	Road transport - other	56.1127	45.9862	43.1278	52.2405	49.8317
8 Western Africa	Non-road transport - diesel	4.93231	6.27415	8.64747	9.54829	12.7276
8 Western Africa	Non-road transport - other	0.29993	0.53347	1.37908	2.3053	0.54369
8 Western Africa	Other	397.283	471.675	565.567	639.351	693.319
8 Western Africa	Sum	4055.87	4605.88	5307.71	5887.41	6574.5
10 South Africa	Power - coal	80.164	87.0165	96.4619	93.2877	100.13
10 South Africa	Power - other fuels	0.94564	0.84431	1.04368	1.27178	1.32473
10 South Africa	Industry	57.2461	68.1535	48.1604	43.4903	42.6946
10 South Africa	Coke ovens	6.58104	5.26148	2.89895	2.42691	3.16298
10 South Africa	Fossil fuel production	2.7475	3.23913	3.75195	4.15076	4.03246
10 South Africa	Residential-biomass	127.684	139.722	154.341	163.654	171.316
10 South Africa	Residential-coal	43.2514	49.5373	26.3042	80.2828	55.1249
10 South Africa	Residential-other fuels	11.8954	10.1869	8.61753	7.34874	5.42148
10 South Africa	Road transport - diesel	15.9563	15.1091	19.6221	28.1526	32.8785
10 South Africa	Road transport - other	14.0097	11.8303	7.28495	7.85456	4.9653
10 South Africa	Non-road transport - diesel	7.04457	8.80971	7.79392	7.36241	7.50892
10 South Africa	Non-road transport - other	0.21991	0.33187	0.43763	0.25647	0.19061
10 South Africa	Other	40.1765	43.5498	54.0248	61.3516	60.8759
10 South Africa	Sum	407.922	443.592	430.743	500.89	489.626
11 Western Europe	Power - coal	192.997	111.633	63.3386	42.8716	25.5745
11 Western Europe	Power - other fuels	28.5818	34.0562	33.33	32.0211	31.0676
11 Western Europe	Industry	313.548	210.095	155.44	106.204	93.9319
11 Western Europe	Coke ovens	14.1791	9.2616	5.72062	4.91468	3.50859
11 Western Europe	Fossil fuel production	13.442	12.4967	8.72935	10.2059	7.28675
11 Western Europe	Residential-biomass	397.36	380.735	333.728	308.258	307.444
11 Western Europe	Residential-coal	228.825	93.3934	36.8487	24.693	26.365
11 Western Europe	Residential-other fuels	4.6703	4.74588	4.08359	3.78856	3.23327
11 Western Europe	Road transport - diesel	245.355	314.664	253.779	217.479	159.63
11 Western Europe	Road transport - other	59.9357	46.5121	49.7302	49.8743	49.8775
11 Western Europe	Non-road transport - diesel	152.246	137.728	127.956	115.386	87.3207
11 Western Europe	Non-road transport - other	13.8355	13.4711	10.8017	8.61269	7.13723
11 Western Europe	Other	460.159	331.306	276.173	232.446	234.355
11 Western Europe	Sum	2125.13	1700.1	1359.66	1156.76	1036.73
12 Central Europe	Power - coal	330.085	194.768	123.927	80.237	66.0002
12 Central Europe	Power - other fuels	13.7257	7.84696	5.41916	5.40645	4.01559
12 Central Europe	Industry	395.141	173.15	116.347	62.4536	55.1559
12 Central Europe	Coke ovens	25.2956	16.7676	9.99813	4.7119	2.57035
12 Central Europe	Fossil fuel production	6.95406	5.5527	4.96114	4.69759	4.36875
12 Central Europe	Residential-biomass	122.202	183.862	267.692	276.786	301.352
12 Central Europe	Residential-coal	474.286	242.106	126.569	139.216	176.422
12 Central Europe	Residential-other fuels	1.22671	0.57141	0.58189	0.62042	0.36113
12 Central Europe	Road transport - diesel	36.2259	32.0314	32.3891	39.6051	35.8815
12 Central Europe	Road transport - other	5.56069	4.22624	5.26183	5.54889	5.8592
12 Central Europe	Non-road transport - diesel	32.3377	24.6108	21.6228	18.0567	18.1816
12 Central Europe	Non-road transport - other	3.96187	1.76232	1.48313	1.41749	1.02136
12 Central Europe	Other	162.796	132.315	126.318	112.99	104.198
12 Central Europe	Sum	1609.8	1019.57	842.57	751.748	775.387
13 Turkey	Power - coal	32.099	23.932	34.2839	27.391	40.4944
13 Turkey	Power - other fuels	0.35541	0.70837	0.8146	0.54641	0.36444
13 Turkey	Industry	272.714	185.674	111.875	100.904	100.364
13 Turkey	Coke ovens	7.83031	4.75054	3.90062	2.94075	2.00824
13 Turkey	Fossil fuel production	1.31753	1.43602	1.70841	1.41592	1.7997
13 Turkey	Residential-biomass	137.346	129.296	111.708	90.3995	69.7838
13 Turkey	Residential-coal	55.0366	45.5753	37.371	44.5353	116.53
13 Turkey	Residential-other fuels	0.52191	0.55887	0.30916	0.18059	0.11225
13 Turkey	Road transport - diesel	14.5942	16.6138	11.619	10.7642	11.1294
13 Turkey	Road transport - other	1.63366	2.09348	2.32324	1.85738	1.51333
13 Turkey	Non-road transport - diesel	10.0756	12.9416	13.677	15.4954	19.9241
13 Turkey	Non-road transport - other	0.12628	0.01674	0.38995	0.35564	0.03096
13 Turkey	Other	51.4689	55.9126	57.83	59.1882	60.6842
13 Turkey	Sum	585.12	479.51	387.809	355.974	424.739
14 Ukraine+	Power - coal	89.7387	52.8328	32.9838	29.1552	33.9133
14 Ukraine+	Power - other fuels	13.2442	3.91098	1.50796	0.97782	1.28615
14 Ukraine+	Industry	554.461	192.224	209.861	242.281	226.027
14 Ukraine+	Coke ovens	38.3193	20.1874	19.0718	18.6405	15.8544
14 Ukraine+	Fossil fuel production	4.85185	3.07236	2.44919	2.53524	1.64921
14 Ukraine+	Residential-biomass	10.9735	12.3644	16.5866	17.64	32.7371
14 Ukraine+	Residential-coal	188.722	114.422	60.4072	49.4029	19.6332
14 Ukraine+	Residential-other fuels	1.39816	0.19418	0.0875	0.12334	0.10973
14 Ukraine+	Road transport - diesel	23.1091	11.746	9.14079	8.26435	10.6553
14 Ukraine+	Road transport - other	8.4022	10.1295	8.53866	9.07894	8.53604
14 Ukraine+	Non-road transport - diesel	32.5179	17.6208	12.5998	13.8532	12.2322
14 Ukraine+	Non-road transport - other	6.21388	0.05171	0.11669	0.07354	0.03019
14 Ukraine+	Other	100.266	92.565	90.2975	90.4835	92.0209
14 Ukraine+	Sum	1072.22	531.322	463.648	482.51	454.685
15 Asia-Stan	Power - coal	19.3791	10.9341	9.61488	10.7782	11.4052
15 Asia-Stan	Power - other fuels	2.23851	1.42301	1.15917	1.17889	0.68497
15 Asia-Stan	Industry	328.601	65.0089	47.7575	49.1634	47.3353
15 Asia-Stan	Coke ovens	0.87516	4.09174	5.07862	5.01072	5.13462
15 Asia-Stan	Fossil fuel production	10.5297	9.60751	14.5481	21.5548	14.5594
15 Asia-Stan	Residential-biomass	3.68862	2.58967	2.4252	0.55153	1.85231
15 Asia-Stan	Residential-coal	37.0897	5.49709	7.39842	4.13205	69.029
15 Asia-Stan	Residential-other fuels	2.66323	1.13709	0.8433	1.05313	1.16289
15 Asia-Stan	Road transport - diesel	10.1573	3.43881	5.42276	5.01662	7.31295
15 Asia-Stan	Road transport - other	32.8319	27.55	22.4732	23.9489	25.6147
15 Asia-Stan	Non-road transport - diesel	20.091	13.4825	15.7945	15.0403	11.3351
15 Asia-Stan	Non-road transport - other	0	0	0.15711	0.12645	0.12479
15 Asia-Stan	Other	93.5762	76.9356	78.3777	83.9532	87.8634
15 Asia-Stan	Sum	561.722	221.696	211.05	221.508	283.415
16 Russia+	Power - coal	311.833	226.488	236.666	217.354	174.248
16 Russia+	Power - other fuels	36.3355	22.8023	16.475	13.4605	9.07453
16 Russia+	Industry	1222.61	396.474	408.559	439.311	494.633
16 Russia+	Coke ovens	83.4771	40.2858	38.4715	36.2611	40.1096
16 Russia+	Fossil fuel production	161.4	90.7899	95.3323	135.887	84.0784
16 Russia+	Residential-biomass	192.783	106.694	79.7775	44.9576	37.8883
16 Russia+	Residential-coal	1013.14	242.263	185.406	131.282	101.254
16 Russia+	Residential-other fuels	3.33295	2.15708	1.25595	0.60223	0.68443
16 Russia+	Road transport - diesel	78.2417	26.7229	40.6261	42.6241	42.6959
16 Russia+	Road transport - other	104.203	84.3236	76.9132	89.6853	88.7173
16 Russia+	Non-road transport - diesel	130.004	66.6597	44.5592	36.8835	30.8322
16 Russia+	Non-road transport - other	6.63188	1.86516	1.29484	1.0739	0.6932
16 Russia+	Other	358.231	306.779	304.7	306.048	308.078
16 Russia+	Sum	3702.22	1614.3	1530.04	1495.43	1412.99
17 Middle East	Power - coal	2.18729	3.55469	4.50064	4.02149	2.5118
17 Middle East	Power - other fuels	11.0072	16.2149	17.6961	21.4844	35.2708
17 Middle East	Industry	206.614	237.294	262.006	136.462	126.168
17 Middle East	Coke ovens	2.00485	2.78388	2.83172	2.12033	2.43639
17 Middle East	Fossil fuel production	62.6876	54.3232	67.1032	66.0739	65.3001
17 Middle East	Residential-biomass	10.0436	13.1124	10.7582	20.4439	17.9813
17 Middle East	Residential-coal	0	0.32877	0.32011	0.15342	0.15018
17 Middle East	Residential-other fuels	1.763	1.90716	2.02998	1.98296	1.20039
17 Middle East	Road transport - diesel	138.912	160.45	176.268	199.664	199.77
17 Middle East	Road transport - other	89.5031	109.396	102.479	109.762	98.0927
17 Middle East	Non-road transport - diesel	43.2929	44.2675	51.1654	62.3565	68.056
17 Middle East	Non-road transport - other	0.91734	0.61783	0.77479	0.54814	0.46249
17 Middle East	Other	117.525	133.596	147.074	159.211	176.767
17 Middle East	Sum	686.458	777.846	845.008	784.284	794.167
18 India	Power - coal	316.002	510.207	561.581	475.691	404.816
18 India	Power - other fuels	6.58804	9.99915	15.8067	15.7023	26.1462
18 India	Industry	1288.1	1528.44	1788.02	1292.64	1198.75
18 India	Coke ovens	21.4937	21.0071	18.4292	27.1808	41.3846
18 India	Fossil fuel production	3.46827	4.1447	4.18107	4.44994	5.24484
18 India	Residential-biomass	2342.64	2456.65	2290.91	2455.87	2648.52
18 India	Residential-coal	459.468	485.861	286.595	260.431	210.026
18 India	Residential-other fuels	309.459	324.973	318.667	294.802	283.084
18 India	Road transport - diesel	106.38	163.337	147.343	146.445	221.321
18 India	Road transport - other	103.284	101.016	105.554	55.4238	38.5451
18 India	Non-road transport - diesel	17.0047	20.9236	43.3431	44.7959	53.3847
18 India	Non-road transport - other	1.23253	0.81481	0.04058	0.04058	0.0856
18 India	Other	801.249	833.324	896.687	888.18	905.995
18 India	Sum	5776.36	6460.69	6477.16	5961.65	6037.3
19 Korea	Power - coal	41.5676	35.7869	26.458	27.4233	24.9589
19 Korea	Power - other fuels	1.49497	2.83579	2.5653	2.72174	2.42597
19 Korea	Industry	250.338	184.154	163.929	137.085	125.968
19 Korea	Coke ovens	20.4261	4.49635	4.8393	4.13435	4.7295
19 Korea	Fossil fuel production	1.70285	1.29952	1.5756	1.83753	2.06532
19 Korea	Residential-biomass	184.825	193.095	193.063	196.683	191.785
19 Korea	Residential-coal	158.64	25.0512	10.4119	63.5642	57.3177
19 Korea	Residential-other fuels	2.74765	2.1382	1.55912	2.11424	2.17158
19 Korea	Road transport - diesel	37.351	51.431	38.236	33.2556	21.0416
19 Korea	Road transport - other	6.50562	6.47268	6.59331	6.80463	6.0946
19 Korea	Non-road transport - diesel	11.2432	17.9978	17.541	7.61676	6.12538
19 Korea	Non-road transport - other	0.4068	0.75582	1.04283	0.86918	1.00052
19 Korea	Other	54.4995	61.0182	65.4276	67.2915	69.2942
19 Korea	Sum	771.748	586.533	533.242	551.401	514.978
20 China+	Power - coal	771.65	932.826	911.235	934.254	972.052
20 China+	Power - other fuels	18.07	23.1301	26.1143	32.3591	37.7366
20 China+	Industry	2409.41	4341.23	4237	6009.15	6141.84
20 China+	Coke ovens	177.975	278.547	387.89	674.306	783.984
20 China+	Fossil fuel production	25.3609	31.1278	31.0158	50.071	77.946
20 China+	Residential-biomass	4226.8	4278.07	4220.71	3906.38	3746.96
20 China+	Residential-coal	1622.03	1390.1	2005.09	2089.23	2216.36
20 China+	Residential-other fuels	21.2602	23.3768	26.1288	30.3705	33.3602
20 China+	Road transport - diesel	29.0428	45.1521	162.082	249.602	350.684
20 China+	Road transport - other	71.7229	108.872	128.189	126.233	106.973
20 China+	Non-road transport - diesel	97.1415	119.833	93.5309	147.719	152.219
20 China+	Non-road transport - other	2.18669	2.87439	1.97041	3.17532	3.50699
20 China+	Other	1394.27	1497.41	1403.24	1422.35	1476.82
20 China+	Sum	10866.9	13072.5	13634.2	15675.2	16100.4
21 Southeastern Asia	Power - coal	25.3155	30.8967	39.2841	44.723	55.0378
21 Southeastern Asia	Power - other fuels	5.84708	8.2107	8.37617	5.5789	6.34436
21 Southeastern Asia	Industry	553.323	902.036	775.338	447.534	400.309
21 Southeastern Asia	Coke ovens	0	0	0	0	0
21 Southeastern Asia	Fossil fuel production	4.33919	5.30709	6.12444	7.57267	7.44925
21 Southeastern Asia	Residential-biomass	828.11	786.481	804.422	841.484	881.367
21 Southeastern Asia	Residential-coal	5.45026	10.5011	14.0679	19.9228	23.7415
21 Southeastern Asia	Residential-other fuels	102.862	75.1895	60.7119	51.9399	41.4144
21 Southeastern Asia	Road transport - diesel	66.9297	108.605	119.562	144.624	140.344
21 Southeastern Asia	Road transport - other	22.1606	31.3452	33.9874	36.9997	54.2546
21 Southeastern Asia	Non-road transport - diesel	23.409	29.8777	40.9662	48.8144	53.9943
21 Southeastern Asia	Non-road transport - other	0.31015	0.59317	0.7289	1.33154	1.09006
21 Southeastern Asia	Other	239.538	268.247	294.088	322.98	346.866
21 Southeastern Asia	Sum	1877.6	2257.29	2197.66	1973.51	2012.21
22 Indonesia+	Power - coal	4.76363	5.95503	12.5251	17.4224	22.9037
22 Indonesia+	Power - other fuels	3.21319	4.40207	5.95721	10.3317	11.6773
22 Indonesia+	Industry	135.989	163.931	137.263	104.362	93.7283
22 Indonesia+	Coke ovens	0	0	0	0	0
22 Indonesia+	Fossil fuel production	8.95178	10.7717	9.939	7.65196	7.65121
22 Indonesia+	Residential-biomass	741.951	792.415	844.064	912.577	974.357
22 Indonesia+	Residential-coal	0.18411	0.63021	0.65002	0.58472	0.57042
22 Indonesia+	Residential-other fuels	88.9118	84.4111	79.6321	73.945	59.5746
22 Indonesia+	Road transport - diesel	29.1737	43.4245	57.0746	47.195	72.398
22 Indonesia+	Road transport - other	8.98927	13.4692	17.6128	22.7773	29.1485
22 Indonesia+	Non-road transport - diesel	11.5941	16.8476	22.6917	27.8273	28.6836
22 Indonesia+	Non-road transport - other	0.27116	0.56601	0.70117	0.65863	0.21099
22 Indonesia+	Other	195.886	233.757	258.754	284.947	303.66
22 Indonesia+	Sum	1229.88	1370.58	1446.87	1510.28	1604.56
23 Japan	Power - coal	14.7921	11.0902	8.08039	8.703	7.57388
23 Japan	Power - other fuels	13.0524	10.8652	8.06304	9.39617	7.23493
23 Japan	Industry	128.989	85.9301	45.7896	43.779	42.3231
23 Japan	Coke ovens	6.95209	5.55098	4.64551	4.02389	4.25907
23 Japan	Fossil fuel production	1.72409	1.92927	2.08078	2.39066	2.31795
23 Japan	Residential-biomass	2.2347	1.5758	0.9631	0.47927	0.46079
23 Japan	Residential-coal	7.09562	3.70327	3.61054	3.16102	3.05875
23 Japan	Residential-other fuels	1.16042	1.32836	1.23983	1.10996	0.77901
23 Japan	Road transport - diesel	69.692	80.7507	62.8897	41.6418	21.7521
23 Japan	Road transport - other	16.7485	16.6448	18.4062	15.0787	11.1882
23 Japan	Non-road transport - diesel	28.5579	30.6148	34.9538	29.5401	16.2793
23 Japan	Non-road transport - other	3.51507	3.89019	2.92743	2.04751	1.24955
23 Japan	Other	42.7946	41.3514	42.5689	42.0619	41.227
23 Japan	Sum	337.308	295.225	236.219	203.413	159.704
24 Oceania	Power - coal	23.9512	23.6715	26.2218	29.0605	26.3804
24 Oceania	Power - other fuels	0.30165	0.20701	0.23453	0.49028	0.41345
24 Oceania	Industry	22.8931	20.1741	13.3262	11.5271	10.8746
24 Oceania	Coke ovens	2.93128	0.97757	0.55978	0.54948	0.56032
24 Oceania	Fossil fuel production	3.75502	3.56517	3.56944	3.70801	3.89034
24 Oceania	Residential-biomass	49.4542	52.2891	48.4837	36.1008	32.2172
24 Oceania	Residential-coal	3.33871	1.98884	1.32612	1.63702	1.12414
24 Oceania	Residential-other fuels	0.05415	0.04652	0.0431	0.0524	0.04968
24 Oceania	Road transport - diesel	16.3328	16.8302	18.231	17.0666	15.3382
24 Oceania	Road transport - other	7.45024	6.95544	6.42222	6.07003	5.33865
24 Oceania	Non-road transport - diesel	13.0435	14.5781	17.1126	19.9673	19.8144
24 Oceania	Non-road transport - other	0.17936	0.15894	0.15881	0.31261	0.31372
24 Oceania	Other	44.7448	52.0292	74.5285	74.0484	71.4349
24 Oceania	Sum	188.43	193.472	210.218	200.591	187.75
25 Rest South Asia	Power - coal	0	0	0.21166	0.29446	0.48492
25 Rest South Asia	Power - other fuels	1.8542	3.24302	5.9382	7.2664	9.39991
25 Rest South Asia	Industry	181.937	216.034	276.909	249.15	214.924
25 Rest South Asia	Coke ovens	1.4708	1.09598	0.94277	0.9343	0.93606
25 Rest South Asia	Fossil fuel production	0.67078	0.84006	0.96465	1.17532	1.49402
25 Rest South Asia	Residential-biomass	849.931	924.365	1032.78	1119.74	1188.89
25 Rest South Asia	Residential-coal	16.7506	15.6707	37.0022	54.6809	93.9701
25 Rest South Asia	Residential-other fuels	125.602	111.697	102.887	93.5107	80.5933
25 Rest South Asia	Road transport - diesel	30.1244	46.2263	61.6272	64.4831	72.8072
25 Rest South Asia	Road transport - other	36.4966	35.5682	29.5989	31.6429	45.8708
25 Rest South Asia	Non-road transport - diesel	7.20303	9.51463	10.8483	12.8889	10.5627
25 Rest South Asia	Non-road transport - other	0	0.06952	0.07687	0.19434	0.34055
25 Rest South Asia	Other	203.121	264.549	299.449	325.65	344.682
25 Rest South Asia	Sum	1455.16	1628.87	1859.23	1961.61	2064.96
Global	Power - coal	2454.71	2474.45	2312.5	2168.76	2038.08
Global	Power - other fuels	202.559	194.397	192.431	208.589	255.794
Global	Industry	9930.83	10653.6	10525.1	10921.2	10897.8
Global	Coke ovens	466.359	457.973	541.5	817.193	947.523
Global	Fossil fuel production	433.633	379.917	396.498	449.788	400.278
Global	Residential-biomass	14585.9	15184.4	15583.7	16149.5	16961.6
Global	Residential-coal	4442.75	2791.13	2895.76	3012.44	3218.39
Global	Residential-other fuels	996.855	943.656	901.939	852.545	799.856
Global	Road transport - diesel	1440.29	1730.26	1856.71	1948.59	2033.59
Global	Road transport - other	972.99	1005.35	953.758	918.222	872.118
Global	Non-road transport - diesel	905.571	820.376	821.522	897.952	884.637
Global	Non-road transport - other	69.7971	48.0974	44.2927	49.432	39.221
Global	Other	5703.52	5952.09	6260.95	6486.33	6702.82
Global	Total	42605.7	42635.7	43286.6	44880.5	46051.7

## Sheet: PM1
Region	Sector	1990	1995	2000	2005	2010
1 Canada	Power - coal	4.87953	4.7099	3.53802	3.41967	2.09334
1 Canada	Power - other fuels	0.82645	0.55629	0.83864	0.97911	0.63734
1 Canada	Industry	10.2105	9.4331	5.86102	5.51586	4.31631
1 Canada	Coke ovens	2.37981	0.65147	0.44757	0.42391	0.4209
1 Canada	Fossil fuel production	0.90508	1.108	0.93663	0.6777	0.98656
1 Canada	Residential-biomass	90.3802	94.7268	100.37	100.279	114.781
1 Canada	Residential-coal	0.64259	0.73722	0.4845	0.43964	0.35775
1 Canada	Residential-other fuels	0.38352	0.35631	0.41839	0.56102	0.28942
1 Canada	Road transport - diesel	15.1605	18.0978	15.1805	13.8816	10.8523
1 Canada	Road transport - other	11.076	14.2935	14.3663	13.0292	9.54118
1 Canada	Non-road transport - diesel	26.0409	27.7313	31.0654	25.7328	24.2229
1 Canada	Non-road transport - other	0.51716	0.66461	0.64702	0.81056	0.96106
1 Canada	Other	21.0966	21.5937	21.6998	20.9694	20.1463
1 Canada	Sum	184.499	194.66	195.853	186.719	189.606
2 USA	Power - coal	69.6221	74.4522	30.6372	26.4657	7.23839
2 USA	Power - other fuels	9.85754	6.56863	7.68903	8.68261	4.25201
2 USA	Industry	62.4807	46.9913	31.5943	25.2917	22.5611
2 USA	Coke ovens	16.0795	4.27533	2.60591	1.91938	1.87539
2 USA	Fossil fuel production	5.44501	5.15308	4.10314	3.73521	3.5628
2 USA	Residential-biomass	330.058	337.785	249.803	260.779	214.732
2 USA	Residential-coal	64.5641	26.1082	20.2863	6.44317	3.0919
2 USA	Residential-other fuels	3.20864	2.62079	2.33103	2.31023	2.11977
2 USA	Road transport - diesel	160.68	190.966	176.56	166.562	84.6486
2 USA	Road transport - other	111.183	118.031	113.817	103.872	83.303
2 USA	Non-road transport - diesel	154.53	106.073	102.57	113.35	97.0562
2 USA	Non-road transport - other	25.8642	15.5955	14.842	19.9324	14.4881
2 USA	Other	149.144	160.605	192.192	190.799	188.278
2 USA	Sum	1162.72	1095.23	949.029	930.142	727.208
3 Mexico	Power - coal	0.53335	0.91359	0.90801	1.46811	1.43336
3 Mexico	Power - other fuels	4.39862	4.62069	6.85365	6.15833	5.11172
3 Mexico	Industry	55.0526	53.6357	62.6464	40.739	39.4489
3 Mexico	Coke ovens	5.38438	4.73827	3.94439	2.32471	2.92234
3 Mexico	Fossil fuel production	1.40312	1.41267	2.3284	1.22102	3.20249
3 Mexico	Residential-biomass	149.399	150.953	153.995	143.98	140.417
3 Mexico	Residential-coal	0	0	0	0	0
3 Mexico	Residential-other fuels	5.66366	4.06493	2.89106	2.03291	1.09623
3 Mexico	Road transport - diesel	38.6438	37.3473	37.6009	33.5579	31.1476
3 Mexico	Road transport - other	45.588	46.4632	43.3225	44.5824	43.0475
3 Mexico	Non-road transport - diesel	12.4794	14.5793	16.0636	16.7956	19.936
3 Mexico	Non-road transport - other	0.56448	0.46323	1.08967	0.92572	0.94396
3 Mexico	Other	56.3486	59.1733	63.4662	67.4586	68.2813
3 Mexico	Sum	375.459	378.365	395.11	361.244	356.988
4 Rest Central America	Power - coal	0.00839	0.01681	0.06519	0.0895	0.10179
4 Rest Central America	Power - other fuels	3.50083	3.71529	4.00675	4.69835	5.72953
4 Rest Central America	Industry	43.7017	33.8321	33.9441	22.8351	17.0553
4 Rest Central America	Coke ovens	0	0	0	0	0
4 Rest Central America	Fossil fuel production	1.64239	1.70208	2.0738	2.36309	2.07012
4 Rest Central America	Residential-biomass	176.663	184.427	195.852	213.547	240.337
4 Rest Central America	Residential-coal	0.3898	0.7354	0.64971	0.64257	1.95147
4 Rest Central America	Residential-other fuels	0.86829	0.63246	0.64966	0.71374	0.50934
4 Rest Central America	Road transport - diesel	10.8618	16.1646	22.2875	24.3336	26.9787
4 Rest Central America	Road transport - other	11.7335	11.2531	8.15632	7.21482	4.37147
4 Rest Central America	Non-road transport - diesel	12.52	9.29831	11.8826	9.87242	9.6
4 Rest Central America	Non-road transport - other	0.14858	0.37631	0.55252	0.95658	1.24876
4 Rest Central America	Other	66.5373	68.6814	72.888	79.0559	80.3718
4 Rest Central America	Sum	328.576	330.835	353.008	366.323	390.325
5 Brazil	Power - coal	0.17223	0.20295	1.31211	1.55827	0.89034
5 Brazil	Power - other fuels	8.20681	9.75757	4.60364	4.84057	16.2415
5 Brazil	Industry	185.904	195.296	164.586	203.069	231.423
5 Brazil	Coke ovens	17.9555	19.0921	14.9812	12.5117	14.1715
5 Brazil	Fossil fuel production	0.86183	0.86332	1.78027	1.95501	1.39378
5 Brazil	Residential-biomass	230.433	180.304	184.288	233.687	220.524
5 Brazil	Residential-coal	1.23316	1.04385	0.92901	0.90389	1.0784
5 Brazil	Residential-other fuels	23.8561	19.8023	16.2369	13.0493	8.34941
5 Brazil	Road transport - diesel	78.4848	94.6942	105.26	93.1809	85.1227
5 Brazil	Road transport - other	9.06772	10.3444	10.8253	12.0972	14.7335
5 Brazil	Non-road transport - diesel	18.4793	23.4499	24.2042	27.6847	34.592
5 Brazil	Non-road transport - other	0.06278	0.06981	0.16675	0.16278	0.14055
5 Brazil	Other	131.276	165.522	188.958	214.049	217.381
5 Brazil	Sum	705.993	720.443	718.131	818.75	846.042
6 Rest South America	Power - coal	0.81845	0.91877	1.00517	0.72712	0.8293
6 Rest South America	Power - other fuels	2.73094	2.94026	3.17327	4.76899	6.37665
6 Rest South America	Industry	82.3221	94.7258	92.4584	70.5908	67.1199
6 Rest South America	Coke ovens	4.37029	3.83385	4.63184	3.42474	6.85948
6 Rest South America	Fossil fuel production	6.29708	7.13615	6.05305	5.88338	5.53437
6 Rest South America	Residential-biomass	284.921	280.541	250.594	240.09	277.662
6 Rest South America	Residential-coal	4.26254	4.56182	1.50981	1.69309	1.38907
6 Rest South America	Residential-other fuels	3.6108	3.08479	2.61374	2.17478	1.66166
6 Rest South America	Road transport - diesel	53.6828	75.4777	85.9752	91.9219	100.695
6 Rest South America	Road transport - other	51.9052	54.476	29.4455	24.5985	18.6529
6 Rest South America	Non-road transport - diesel	17.7563	26.4257	28.3102	38.8933	46.4649
6 Rest South America	Non-road transport - other	0.78821	1.06917	0.81986	0.99926	1.26227
6 Rest South America	Other	143.356	177.176	201.707	226.352	229.748
6 Rest South America	Sum	656.821	732.368	708.297	712.117	764.256
7 Northern Africa	Power - coal	0.20047	0.40764	0.53799	0.71976	0.54447
7 Northern Africa	Power - other fuels	2.80871	2.82314	3.04285	4.01176	5.42964
7 Northern Africa	Industry	131.167	163.503	198.503	145.139	148.94
7 Northern Africa	Coke ovens	4.27769	4.2589	3.28675	3.5853	3.55698
7 Northern Africa	Fossil fuel production	28.7593	33.6033	26.0865	22.4597	20.3141
7 Northern Africa	Residential-biomass	29.6634	33.2724	38.3596	42.9002	46.3014
7 Northern Africa	Residential-coal	0	0	0	0.22359	0.20421
7 Northern Africa	Residential-other fuels	48.0816	28.9429	18.5052	11.3003	4.18963
7 Northern Africa	Road transport - diesel	44.1964	58.2606	76.8708	92.718	126.434
7 Northern Africa	Road transport - other	45.7756	44.925	32.333	27.9256	34.9123
7 Northern Africa	Non-road transport - diesel	12.1727	12.3838	14.4547	23.1894	34.294
7 Northern Africa	Non-road transport - other	0.54563	0.8184	1.0227	1.36479	1.48855
7 Northern Africa	Other	99.4967	93.0314	101.001	109.953	115.306
7 Northern Africa	Sum	447.146	476.23	514.005	485.491	541.916
8 Western Africa	Power - coal	0.6668	0.66265	0.57818	0.57505	0.39857
8 Western Africa	Power - other fuels	1.88684	2.12789	2.76807	3.73802	11.7028
8 Western Africa	Industry	108.739	132.891	151.504	141.274	151.194
8 Western Africa	Coke ovens	1.2806	1.19339	1.1852	0.73231	1.28333
8 Western Africa	Fossil fuel production	53.0135	66.2711	70.9564	61.7521	49.0324
8 Western Africa	Residential-biomass	2940.98	3332.85	3853.71	4364.43	4930.77
8 Western Africa	Residential-coal	17.2949	18.2852	21.5809	24.2426	29.2128
8 Western Africa	Residential-other fuels	222.591	230.936	240.916	247.611	258.591
8 Western Africa	Road transport - diesel	29.8331	29.5579	42.5179	53.4543	70.1144
8 Western Africa	Road transport - other	50.5686	41.2439	38.469	46.7267	44.1346
8 Western Africa	Non-road transport - diesel	4.7679	6.06502	8.35922	9.23001	12.3033
8 Western Africa	Non-road transport - other	0.28978	0.51543	1.33245	2.22734	0.5253
8 Western Africa	Other	291.751	350.421	403.795	459.555	504.399
8 Western Africa	Sum	3723.66	4213.02	4837.67	5415.55	6063.66
10 South Africa	Power - coal	32.0375	34.3822	37.7451	35.9328	38.4059
10 South Africa	Power - other fuels	0.83776	0.81012	0.97589	1.21183	1.26503
10 South Africa	Industry	24.3671	32.4071	23.4357	20.2583	19.3538
10 South Africa	Coke ovens	5.90602	4.67242	2.49283	2.08874	2.69924
10 South Africa	Fossil fuel production	0.6992	0.82484	1.1536	1.2563	1.01809
10 South Africa	Residential-biomass	124.114	135.815	150.026	159.055	166.477
10 South Africa	Residential-coal	24.055	28.256	15.6593	48.2796	34.0682
10 South Africa	Residential-other fuels	11.5858	9.88029	8.32728	7.02121	5.11124
10 South Africa	Road transport - diesel	13.9963	13.1961	17.4216	25.1893	29.4547
10 South Africa	Road transport - other	12.4694	10.4423	6.30139	6.75809	4.1271
10 South Africa	Non-road transport - diesel	6.80975	8.51605	7.53412	7.11699	7.25862
10 South Africa	Non-road transport - other	0.21247	0.32065	0.42283	0.2478	0.18417
10 South Africa	Other	27.7455	29.9593	35.1442	40.054	44.1766
10 South Africa	Sum	284.836	309.483	306.64	354.47	353.599
11 Western Europe	Power - coal	90.3176	45.1133	30.4497	20.2013	12.7856
11 Western Europe	Power - other fuels	18.6956	21.5997	22.596	22.6832	22.2081
11 Western Europe	Industry	98.6975	71.3326	58.3491	39.7672	36.4888
11 Western Europe	Coke ovens	12.9532	8.32068	4.87934	4.14498	2.89668
11 Western Europe	Fossil fuel production	3.86399	4.34066	2.76205	2.35061	1.50299
11 Western Europe	Residential-biomass	377.126	363.63	321.761	295.63	293.201
11 Western Europe	Residential-coal	91.2708	47.3032	28.851	18.8312	20.7721
11 Western Europe	Residential-other fuels	4.09981	4.13719	3.75237	3.5485	3.09503
11 Western Europe	Road transport - diesel	191.081	245.933	195.188	165.646	120.329
11 Western Europe	Road transport - other	38.9211	27.3273	27.9817	26.8177	25.243
11 Western Europe	Non-road transport - diesel	142.606	129.678	120.303	107.632	80.4071
11 Western Europe	Non-road transport - other	9.41603	8.79603	7.43661	6.17328	5.17719
11 Western Europe	Other	317.921	194.283	141.329	120.573	126.791
11 Western Europe	Sum	1396.97	1171.8	965.639	833.999	750.898
12 Central Europe	Power - coal	174.69	103.582	63.0838	36.1307	28.663
12 Central Europe	Power - other fuels	9.22622	5.27027	3.69924	3.71559	2.87655
12 Central Europe	Industry	151.978	69.8221	44.6847	21.2881	17.0209
12 Central Europe	Coke ovens	22.2517	15.4652	9.21683	4.63437	2.43406
12 Central Europe	Fossil fuel production	1.78933	1.3322	1.09741	1.21088	1.10384
12 Central Europe	Residential-biomass	120.422	181.41	263.354	272.407	296.611
12 Central Europe	Residential-coal	234.514	144.455	95.8007	109.297	138.9
12 Central Europe	Residential-other fuels	0.80968	0.40201	0.42757	0.4593	0.28659
12 Central Europe	Road transport - diesel	28.2441	24.9757	25.2096	30.7441	27.412
12 Central Europe	Road transport - other	3.70954	2.59554	3.27045	3.13581	3.06338
12 Central Europe	Non-road transport - diesel	31.0715	23.6844	20.7947	17.3285	17.4425
12 Central Europe	Non-road transport - other	2.43241	1.1398	0.9229	0.92741	0.64154
12 Central Europe	Other	112.607	93.0503	87.21	77.2892	70.5918
12 Central Europe	Sum	893.746	667.184	618.772	578.568	607.047
13 Turkey	Power - coal	18.209	13.1335	19.0958	14.8645	22.2752
13 Turkey	Power - other fuels	0.2551	0.51161	0.57703	0.38797	0.27435
13 Turkey	Industry	116.203	84.979	50.9111	46.8476	45.9007
13 Turkey	Coke ovens	6.61612	4.56852	3.74772	2.82179	1.92363
13 Turkey	Fossil fuel production	0.27878	0.2604	0.21502	0.17689	0.1984
13 Turkey	Residential-biomass	136.149	128.17	110.816	89.6992	69.2863
13 Turkey	Residential-coal	46.0804	38.2302	31.3329	37.3623	95.7618
13 Turkey	Residential-other fuels	0.32679	0.35527	0.2106	0.13827	0.09306
13 Turkey	Road transport - diesel	11.3183	12.9047	9.17471	8.31417	8.42519
13 Turkey	Road transport - other	1.17738	1.49596	1.67889	1.31496	1.01213
13 Turkey	Non-road transport - diesel	9.57321	12.2882	13.0546	14.7721	19.0254
13 Turkey	Non-road transport - other	0.12201	0.01617	0.37677	0.34361	0.02991
13 Turkey	Other	39.8809	43.692	44.8905	45.888	46.5078
13 Turkey	Sum	386.19	340.606	286.082	262.931	310.714
14 Ukraine+	Power - coal	38.129	21.5745	13.4466	11.8998	13.3674
14 Ukraine+	Power - other fuels	9.00213	2.7081	1.07299	0.71843	0.94508
14 Ukraine+	Industry	205.726	79.9364	87.675	98.1695	89.2439
14 Ukraine+	Coke ovens	32.3733	19.4093	18.3218	17.8864	15.1878
14 Ukraine+	Fossil fuel production	2.02812	1.43492	1.25154	1.40867	0.75521
14 Ukraine+	Residential-biomass	10.8645	12.2442	16.4316	17.4613	32.3908
14 Ukraine+	Residential-coal	133.8	85.2043	47.1938	35.5979	13.112
14 Ukraine+	Residential-other fuels	0.90716	0.16058	0.08562	0.11208	0.1016
14 Ukraine+	Road transport - diesel	17.8521	9.05421	7.05927	6.31315	8.11938
14 Ukraine+	Road transport - other	6.78268	9.06918	7.66588	8.09294	7.60856
14 Ukraine+	Non-road transport - diesel	31.4265	17.0334	12.1798	13.3914	11.8245
14 Ukraine+	Non-road transport - other	6.00375	0.04996	0.11275	0.07105	0.02916
14 Ukraine+	Other	69.6723	67.0878	66.3689	66.9784	67.957
14 Ukraine+	Sum	564.568	324.967	278.866	278.101	260.642
15 Asia-Stan	Power - coal	8.69806	4.60788	4.14561	4.58884	5.14531
15 Asia-Stan	Power - other fuels	1.67911	1.10175	0.88588	0.89829	0.61172
15 Asia-Stan	Industry	108.667	27.1705	18.6321	19.1987	18.377
15 Asia-Stan	Coke ovens	0.79607	4.03811	4.91315	4.74343	4.74683
15 Asia-Stan	Fossil fuel production	8.23191	7.95541	12.8168	19.2982	12.748
15 Asia-Stan	Residential-biomass	3.64101	2.55624	2.3939	0.54444	1.82903
15 Asia-Stan	Residential-coal	26.6537	3.68157	4.51537	2.53138	49.2657
15 Asia-Stan	Residential-other fuels	2.00058	0.86482	0.60892	0.75788	0.81007
15 Asia-Stan	Road transport - diesel	8.90995	3.04578	4.73605	4.37767	6.43286
15 Asia-Stan	Road transport - other	29.5639	24.96	20.3463	21.6693	22.9044
15 Asia-Stan	Non-road transport - diesel	19.4213	13.0331	15.268	14.539	10.9573
15 Asia-Stan	Non-road transport - other	0	0	0.15179	0.12218	0.12057
15 Asia-Stan	Other	73.7978	60.545	57.0521	61.0019	63.5426
15 Asia-Stan	Sum	292.06	153.56	146.466	154.271	197.491
16 Russia+	Power - coal	154.131	110.869	119.036	107.935	87.7532
16 Russia+	Power - other fuels	25.6766	16.0983	11.4259	9.35834	6.54133
16 Russia+	Industry	423.217	166.279	164.645	172.725	191.621
16 Russia+	Coke ovens	70.5314	37.7591	35.7887	33.2549	36.115
16 Russia+	Fossil fuel production	145.202	81.1308	85.6016	123.979	75.4915
16 Russia+	Residential-biomass	190.203	105.279	78.7228	44.3652	37.394
16 Russia+	Residential-coal	439.925	169.27	142.581	64.3543	43.0673
16 Russia+	Residential-other fuels	2.3994	1.45975	0.93668	0.51455	0.54899
16 Russia+	Road transport - diesel	65.9066	22.4079	34.0472	35.7992	35.8147
16 Russia+	Road transport - other	95.4447	77.5765	70.7944	82.8243	81.6055
16 Russia+	Non-road transport - diesel	124.009	64.1102	42.5289	35.6144	29.8037
16 Russia+	Non-road transport - other	4.08398	1.1749	0.85469	0.67938	0.66976
16 Russia+	Other	246.844	224.93	224.09	224.669	225.531
16 Russia+	Sum	1987.58	1078.34	1011.05	936.073	851.956
17 Middle East	Power - coal	0.85493	1.38689	1.72029	1.46768	0.80679
17 Middle East	Power - other fuels	8.86138	13.0292	14.0515	16.4763	25.57
17 Middle East	Industry	85.3287	97.512	100.512	61.2289	52.2789
17 Middle East	Coke ovens	1.782	2.44855	2.41171	1.80741	2.05928
17 Middle East	Fossil fuel production	58.6963	50.8069	62.7309	61.7547	61.036
17 Middle East	Residential-biomass	9.57121	12.4937	10.3145	19.6606	17.3783
17 Middle East	Residential-coal	0	0.27378	0.26657	0.12776	0.1255
17 Middle East	Residential-other fuels	1.18495	1.34454	1.43014	1.44188	0.94749
17 Middle East	Road transport - diesel	122.549	141.436	154.955	175.156	175.025
17 Middle East	Road transport - other	79.4345	96.9811	90.4739	97.0738	87.2728
17 Middle East	Non-road transport - diesel	41.8498	42.7919	49.4599	60.278	65.7875
17 Middle East	Non-road transport - other	0.88631	0.59694	0.74859	0.5296	0.44685
17 Middle East	Other	89.8456	101.024	106.933	116.998	126.566
17 Middle East	Sum	500.844	562.125	596.008	614.001	615.301
18 India	Power - coal	126.642	205.991	228.557	195.16	165.227
18 India	Power - other fuels	6.14435	9.43795	14.9233	14.8001	23.4435
18 India	Industry	685.849	878.479	1058.29	685.754	757.312
18 India	Coke ovens	18.161	19.2576	16.5613	23.9015	35.8869
18 India	Fossil fuel production	2.93938	3.41086	3.24552	3.35065	3.85239
18 India	Residential-biomass	2313.73	2426.33	2262.4	2425.32	2615.71
18 India	Residential-coal	197.401	208.07	139.329	138.516	157.033
18 India	Residential-other fuels	302.81	317.649	310.663	285.849	273.358
18 India	Road transport - diesel	94.3033	144.813	130.551	130.253	198.061
18 India	Road transport - other	94.09	91.8953	95.8436	50.1062	33.5865
18 India	Non-road transport - diesel	16.4379	20.2261	41.8983	43.3027	51.6052
18 India	Non-road transport - other	1.19085	0.78726	0.03921	0.03921	0.08271
18 India	Other	647.522	672.854	718.23	707.602	720.576
18 India	Sum	4507.22	4999.2	5020.54	4703.96	5035.73
19 Korea	Power - coal	23.2646	19.7761	13.622	15.7744	13.0599
19 Korea	Power - other fuels	1.18604	2.20988	1.93424	2.02127	1.77207
19 Korea	Industry	168.061	138.77	107.396	92.1234	81.5016
19 Korea	Coke ovens	20.5091	4.59413	4.94801	4.21065	4.70754
19 Korea	Fossil fuel production	0.25428	0.14751	0.14802	0.14835	0.13527
19 Korea	Residential-biomass	181.694	189.785	189.753	193.309	188.493
19 Korea	Residential-coal	131.285	20.7703	8.66051	44.2738	39.9061
19 Korea	Residential-other fuels	2.39548	1.78542	1.43274	2.0272	2.11786
19 Korea	Road transport - diesel	34.3991	47.5494	35.0342	30.7116	19.2946
19 Korea	Road transport - other	5.46775	5.25688	5.339	5.34239	4.55203
19 Korea	Non-road transport - diesel	10.8684	17.3979	16.9563	7.36287	5.92132
19 Korea	Non-road transport - other	0.39304	0.73026	1.00756	0.83979	0.96668
19 Korea	Other	42.8807	47.5067	50.4997	51.9476	53.3762
19 Korea	Sum	622.658	496.279	436.731	450.092	415.805
20 China+	Power - coal	333.766	399.063	381.86	373.909	377.986
20 China+	Power - other fuels	13.6887	17.7866	20.8146	26.5653	32.4322
20 China+	Industry	1872.69	3817.11	3715.64	4310.78	3287.49
20 China+	Coke ovens	177.163	274.438	370.687	643.45	750.537
20 China+	Fossil fuel production	7.82735	9.20853	10.3247	14.8996	16.4025
20 China+	Residential-biomass	4160.63	4211.08	4154.53	3844.98	3687.15
20 China+	Residential-coal	1291.74	1103.78	1631.88	1695.42	1798.25
20 China+	Residential-other fuels	20.5269	22.4256	25.2172	29.3051	32.0924
20 China+	Road transport - diesel	26.0684	40.4955	146.086	224.701	315.058
20 China+	Road transport - other	63.4693	96.3375	113.235	111.593	93.0684
20 China+	Non-road transport - diesel	93.9035	115.838	90.4132	142.795	147.145
20 China+	Non-road transport - other	2.11274	2.77719	1.90378	3.06794	3.38839
20 China+	Other	1092.77	1140.95	1069.22	1053.5	1068.17
20 China+	Sum	9156.36	11251.3	11731.8	12475	11609.2
21 Southeastern Asia	Power - coal	13.4229	16.7856	20.343	22.6017	26.1002
21 Southeastern Asia	Power - other fuels	4.61477	6.62857	6.75483	4.59423	5.03529
21 Southeastern Asia	Industry	568.326	958.69	801.073	414.23	357.231
21 Southeastern Asia	Coke ovens	0	0	0	0	0
21 Southeastern Asia	Fossil fuel production	3.66607	4.37672	5.01065	6.0412	5.46671
21 Southeastern Asia	Residential-biomass	818.19	777.023	794.742	827.728	866.371
21 Southeastern Asia	Residential-coal	4.54632	7.88946	9.59653	14.4093	17.6532
21 Southeastern Asia	Residential-other fuels	100.211	73.0349	58.7759	50.1041	39.5519
21 Southeastern Asia	Road transport - diesel	61.0718	99.3039	109.448	132.623	128.647
21 Southeastern Asia	Road transport - other	19.5431	27.6997	29.9326	32.0901	47.1755
21 Southeastern Asia	Non-road transport - diesel	22.6287	28.8818	39.6007	47.1872	52.1945
21 Southeastern Asia	Non-road transport - other	0.29966	0.57311	0.70425	1.28651	1.0532
21 Southeastern Asia	Other	183.657	202.708	217.173	237.987	256.547
21 Southeastern Asia	Sum	1800.18	2203.59	2093.16	1790.88	1803.03
22 Indonesia+	Power - coal	1.95157	2.38473	4.88394	6.70092	8.78319
22 Indonesia+	Power - other fuels	2.91134	4.1769	5.61959	9.7601	10.9932
22 Indonesia+	Industry	103.082	134.435	106.24	81.5102	68.8724
22 Indonesia+	Coke ovens	0	0	0	0	0
22 Indonesia+	Fossil fuel production	8.29575	9.92423	8.99106	6.47791	5.76918
22 Indonesia+	Residential-biomass	732.872	782.718	833.736	901.088	962.211
22 Indonesia+	Residential-coal	0.16175	0.55365	0.57106	0.51369	0.50113
22 Indonesia+	Residential-other fuels	86.5855	81.9841	77.0189	71.243	56.7717
22 Indonesia+	Road transport - diesel	26.6793	39.8152	52.3766	43.3466	66.5281
22 Indonesia+	Road transport - other	7.87577	11.8793	15.4791	19.9017	25.3132
22 Indonesia+	Non-road transport - diesel	11.2077	16.286	21.9353	26.8998	27.7274
22 Indonesia+	Non-road transport - other	0.26199	0.54687	0.67746	0.63636	0.20385
22 Indonesia+	Other	153.447	168.9	187.034	205.161	219.591
22 Indonesia+	Sum	1135.33	1253.6	1314.56	1373.24	1453.26
23 Japan	Power - coal	5.60842	3.82381	1.30192	0.90302	0.65201
23 Japan	Power - other fuels	9.94883	8.27945	5.90014	6.59212	4.75813
23 Japan	Industry	95.7771	62.1846	8.10045	6.5698	5.12249
23 Japan	Coke ovens	6.48173	5.07486	4.22372	3.46594	3.50794
23 Japan	Fossil fuel production	0.02766	0.0211	0.01039	0.00142	0.00113
23 Japan	Residential-biomass	2.18506	1.53699	0.93611	0.46212	0.44652
23 Japan	Residential-coal	2.54313	1.44307	1.11576	0.97514	0.94281
23 Japan	Residential-other fuels	1.0344	1.18021	1.13137	1.04713	0.75479
23 Japan	Road transport - diesel	61.0853	70.7345	54.3706	35.2254	17.4702
23 Japan	Road transport - other	13.6407	13.307	14.8959	11.3838	7.82767
23 Japan	Non-road transport - diesel	27.606	29.5943	33.7886	28.5554	15.6681
23 Japan	Non-road transport - other	3.3962	3.75864	2.82844	1.97827	1.21105
23 Japan	Other	28.2885	28.0668	28.8495	28.5028	28.626
23 Japan	Sum	257.623	229.006	157.453	125.662	86.9889
24 Oceania	Power - coal	11.1185	10.5111	11.871	13.1393	12.0894
24 Oceania	Power - other fuels	0.22154	0.15042	0.17494	0.3484	0.31743
24 Oceania	Industry	8.09329	7.61725	4.61761	3.75334	3.21252
24 Oceania	Coke ovens	2.8302	0.9163	0.51626	0.50494	0.51487
24 Oceania	Fossil fuel production	1.86814	1.60042	1.29974	1.26606	1.36675
24 Oceania	Residential-biomass	47.0515	50.127	46.8195	34.9042	31.1946
24 Oceania	Residential-coal	1.76985	0.88507	0.645	0.75046	0.54313
24 Oceania	Residential-other fuels	0.04531	0.04214	0.0409	0.05019	0.04932
24 Oceania	Road transport - diesel	14.6092	15.023	16.238	15.1215	13.5207
24 Oceania	Road transport - other	6.02461	5.63167	5.19252	4.86417	4.20606
24 Oceania	Non-road transport - diesel	12.6087	14.0922	16.5422	19.3017	19.1539
24 Oceania	Non-road transport - other	0.17329	0.15356	0.15344	0.30204	0.30312
24 Oceania	Other	33.6001	39.6971	50.5494	48.9674	46.2711
24 Oceania	Sum	140.014	146.447	154.66	143.274	132.743
25 Rest South Asia	Power - coal	0	0	0.08104	0.11275	0.18567
25 Rest South Asia	Power - other fuels	1.6227	2.7764	4.89215	6.12099	7.44422
25 Rest South Asia	Industry	115.326	129.688	169.551	148.782	146.165
25 Rest South Asia	Coke ovens	1.24274	1.0047	0.84719	0.82157	0.8117
25 Rest South Asia	Fossil fuel production	0.55506	0.70373	0.82556	0.96405	1.23682
25 Rest South Asia	Residential-biomass	838.026	911.482	1018.2	1104.72	1173.02
25 Rest South Asia	Residential-coal	4.27514	3.77065	8.63843	12.6517	21.5302
25 Rest South Asia	Residential-other fuels	122.634	108.775	100.068	90.7416	77.9361
25 Rest South Asia	Road transport - diesel	26.9081	41.2708	55.1704	57.8235	65.6198
25 Rest South Asia	Road transport - other	33.0811	32.1766	26.6822	28.3427	40.8324
25 Rest South Asia	Non-road transport - diesel	6.96293	9.19748	10.4866	12.4593	10.2106
25 Rest South Asia	Non-road transport - other	0	0.06717	0.07427	0.18777	0.32903
25 Rest South Asia	Other	152.645	204.376	229.262	250.18	265.361
25 Rest South Asia	Sum	1303.28	1445.29	1624.78	1713.91	1810.69
Global	Power - coal	1109.74	1075.27	989.824	896.346	826.816
Global	Power - other fuels	148.789	145.685	149.274	164.13	201.97
Global	Industry	5510.97	7486.72	7260.85	6877.44	5859.25
Global	Coke ovens	431.325	440.011	510.639	772.659	895.118
Global	Fossil fuel production	344.55	294.729	311.803	344.631	274.181
Global	Residential-biomass	14299	14886.5	15281.9	15831	16624.7
Global	Residential-coal	2718.41	1915.31	2212.08	2258.48	2468.72
Global	Residential-other fuels	967.82	915.921	874.688	824.114	770.432
Global	Road transport - diesel	1236.52	1492.52	1609.32	1690.96	1771.21
Global	Road transport - other	847.594	875.663	825.847	791.357	742.095
Global	Non-road transport - diesel	867.737	788.656	789.654	863.285	850.602
Global	Non-road transport - other	59.7656	41.061	38.8883	44.8116	35.8958
Global	Other	4272.13	4415.83	4559.54	4705.5	4854.1
Global	Total	32814.3	34773.9	35414.3	36064.7	36175.1

## Sheet: BC
Region	Sector	1990	1995	2000	2005	2010
1 Canada	Power - coal	0.07478	0.0734	0.05264	0.05352	0.02628
1 Canada	Power - other fuels	0.09304	0.05596	0.13512	0.21386	0.1684
1 Canada	Industry	0.48791	0.47227	0.42661	0.43307	0.26772
1 Canada	Coke ovens	0.43506	0.12014	0.08516	0.08246	0.08188
1 Canada	Fossil fuel production	0.55468	0.71105	0.60817	0.42617	0.67549
1 Canada	Residential-biomass	16.2509	17.4572	18.9518	19.9371	23.6346
1 Canada	Residential-coal	0.29643	0.33063	0.191	0.15714	0.06154
1 Canada	Residential-other fuels	0.25942	0.22291	0.30998	0.55376	0.21226
1 Canada	Road transport - diesel	8.3644	10.8024	10.168	9.53648	7.66673
1 Canada	Road transport - other	2.60451	3.22852	3.30997	3.22367	2.69878
1 Canada	Non-road transport - diesel	11.9194	12.6162	14.1807	11.8283	11.138
1 Canada	Non-road transport - other	0.09697	0.12461	0.12132	0.15198	0.1802
1 Canada	Other	2.23715	2.4122	2.34762	2.20764	2.07448
1 Canada	Sum	43.6747	48.6275	50.888	48.8051	48.8864
2 USA	Power - coal	1.36252	1.46334	0.7117	0.60941	0.16042
2 USA	Power - other fuels	0.82777	0.49649	1.35812	2.05252	1.00438
2 USA	Industry	1.89038	1.57796	1.98163	1.57659	1.21846
2 USA	Coke ovens	2.9395	0.78846	0.49584	0.37338	0.36482
2 USA	Fossil fuel production	1.66538	1.4782	0.78923	0.7194	0.67359
2 USA	Residential-biomass	54.487	57.2748	43.5432	47.0121	40.2458
2 USA	Residential-coal	27.5459	12.2539	9.55798	1.71254	0.44086
2 USA	Residential-other fuels	2.50675	1.75403	1.42498	1.68592	1.54479
2 USA	Road transport - diesel	97.6781	116.625	119.113	116.29	58.8431
2 USA	Road transport - other	26.1132	28.2435	29.7317	29.4087	27.7354
2 USA	Non-road transport - diesel	71.5424	47.617	46.2825	50.8715	43.1642
2 USA	Non-road transport - other	4.84954	2.92416	2.78287	3.73732	2.85881
2 USA	Other	17.5899	18.9471	22.8244	22.6842	22.3448
2 USA	Sum	310.998	291.444	280.598	278.733	200.599
3 Mexico	Power - coal	0.01607	0.02549	0.02198	0.03997	0.04257
3 Mexico	Power - other fuels	0.84779	0.91547	1.6489	1.83514	1.77124
3 Mexico	Industry	4.48355	4.31055	4.99333	5.97043	6.24804
3 Mexico	Coke ovens	1.59537	1.40393	1.16871	0.6888	0.86588
3 Mexico	Fossil fuel production	1.14616	1.14616	1.90252	0.98166	2.62597
3 Mexico	Residential-biomass	21.3526	21.5746	22.0094	20.5781	20.0688
3 Mexico	Residential-coal	0	0	0	0	0
3 Mexico	Residential-other fuels	5.42488	3.84413	2.69529	1.86985	0.96205
3 Mexico	Road transport - diesel	21.4537	21.9872	24.3757	25.9577	26.3874
3 Mexico	Road transport - other	8.44334	9.02036	9.49466	11.585	13.0874
3 Mexico	Non-road transport - diesel	5.59946	6.62502	7.21525	7.46651	8.87666
3 Mexico	Non-road transport - other	0.10584	0.08686	0.20431	0.17357	0.17699
3 Mexico	Other	5.81349	6.08176	6.50555	6.94441	7.02573
3 Mexico	Sum	76.2822	77.0216	82.2356	84.0911	88.1388
4 Rest Central America	Power - coal	0.00041	0.00057	0.00243	0.00235	0.00201
4 Rest Central America	Power - other fuels	0.53096	0.69927	0.96924	1.3528	1.98647
4 Rest Central America	Industry	2.99588	2.09727	2.3452	1.60381	1.34671
4 Rest Central America	Coke ovens	0	0	0	0	0
4 Rest Central America	Fossil fuel production	1.36866	1.4184	1.72817	1.96924	1.7251
4 Rest Central America	Residential-biomass	25.6634	26.7957	28.4531	31.0268	34.8993
4 Rest Central America	Residential-coal	0.04867	0.09207	0.08135	0.08452	0.24413
4 Rest Central America	Residential-other fuels	0.88316	0.61383	0.6375	0.73222	0.50104
4 Rest Central America	Road transport - diesel	6.0058	8.95455	12.4467	14.0866	16.3636
4 Rest Central America	Road transport - other	0.88931	0.89126	0.82009	0.81503	0.6777
4 Rest Central America	Non-road transport - diesel	6.04317	4.45338	5.61687	4.71159	4.42373
4 Rest Central America	Non-road transport - other	0.02786	0.07056	0.1036	0.17936	0.23414
4 Rest Central America	Other	7.37453	7.56613	8.01591	8.70937	8.84646
4 Rest Central America	Sum	51.8318	53.653	61.2201	65.2737	71.2504
5 Brazil	Power - coal	0.00644	0.00678	0.00986	0.00449	0.00384
5 Brazil	Power - other fuels	1.29101	1.5794	1.35373	1.45379	2.64165
5 Brazil	Industry	11.1917	12.1074	13.8584	20.1027	26.1471
5 Brazil	Coke ovens	5.32014	5.65691	4.43887	3.70716	4.19895
5 Brazil	Fossil fuel production	0.70936	0.70936	1.46906	1.61583	1.14972
5 Brazil	Residential-biomass	33.7589	26.4165	26.9977	34.2353	32.3108
5 Brazil	Residential-coal	0.14724	0.12443	0.11193	0.10997	0.13258
5 Brazil	Residential-other fuels	23.163	19.2074	15.7103	12.5794	7.97895
5 Brazil	Road transport - diesel	43.8802	52.9372	63.1678	59.8816	62.581
5 Brazil	Road transport - other	1.27575	1.63195	1.76483	1.96481	2.61246
5 Brazil	Non-road transport - diesel	8.00198	10.124	10.4412	11.9556	14.9765
5 Brazil	Non-road transport - other	0.01177	0.01309	0.03127	0.03052	0.02635
5 Brazil	Other	14.0063	17.9625	20.976	23.8518	24.4331
5 Brazil	Sum	142.764	148.477	160.331	171.493	179.193
6 Rest South America	Power - coal	0.02409	0.02804	0.03547	0.02621	0.02063
6 Rest South America	Power - other fuels	0.71759	0.83682	0.94995	1.56083	2.26131
6 Rest South America	Industry	5.44802	5.73761	6.19024	5.21645	5.14639
6 Rest South America	Coke ovens	1.2949	1.13596	1.3724	1.01474	2.03244
6 Rest South America	Fossil fuel production	5.1605	5.8431	4.88831	4.67991	4.35247
6 Rest South America	Residential-biomass	39.4134	38.7705	34.4202	33.0099	38.1919
6 Rest South America	Residential-coal	1.19529	1.19148	0.50806	0.5028	0.38458
6 Rest South America	Residential-other fuels	3.45171	2.93515	2.45966	2.01666	1.5126
6 Rest South America	Road transport - diesel	29.8929	42.1628	49.9757	55.4036	64.5448
6 Rest South America	Road transport - other	4.22634	4.81256	3.37671	3.11907	3.19793
6 Rest South America	Non-road transport - diesel	8.3577	11.9979	12.8869	17.6002	21.4312
6 Rest South America	Non-road transport - other	0.14764	0.2004	0.15361	0.18729	0.2366
6 Rest South America	Other	15.4208	19.3806	22.4421	25.3016	25.8321
6 Rest South America	Sum	114.751	135.033	139.659	149.639	169.145
7 Northern Africa	Power - coal	0.00582	0.01057	0.01364	0.01623	0.00998
7 Northern Africa	Power - other fuels	0.66572	0.73836	1.01316	1.43696	2.09743
7 Northern Africa	Industry	4.81069	5.08989	5.35823	4.81062	4.99209
7 Northern Africa	Coke ovens	1.26746	1.26079	0.97281	1.06183	1.05336
7 Northern Africa	Fossil fuel production	23.9643	28.0006	21.7385	18.7163	16.9284
7 Northern Africa	Residential-biomass	4.45397	4.99585	5.75969	6.51086	7.10374
7 Northern Africa	Residential-coal	0	0	0	0.09827	0.02447
7 Northern Africa	Residential-other fuels	46.3043	27.5431	17.2141	10.3258	3.3726
7 Northern Africa	Road transport - diesel	24.514	32.3479	42.6993	51.6015	70.3496
7 Northern Africa	Road transport - other	4.65363	4.80854	4.38521	4.70505	6.4541
7 Northern Africa	Non-road transport - diesel	5.9454	5.97019	6.95835	10.5804	15.4161
7 Northern Africa	Non-road transport - other	0.10231	0.15345	0.19176	0.2559	0.2791
7 Northern Africa	Other	10.5121	9.55068	10.3151	11.1882	11.7191
7 Northern Africa	Sum	127.2	120.47	116.62	121.308	139.8
8 Western Africa	Power - coal	0.01947	0.01789	0.01484	0.0115	0.00739
8 Western Africa	Power - other fuels	0.68987	0.77966	1.04203	1.44323	4.84196
8 Western Africa	Industry	6.15945	7.17216	8.36107	8.91843	9.5041
8 Western Africa	Coke ovens	0.37944	0.3536	0.35117	0.21698	0.38025
8 Western Africa	Fossil fuel production	44.1543	55.205	59.1097	51.4414	40.8438
8 Western Africa	Residential-biomass	430.163	487.482	563.664	638.366	721.202
8 Western Africa	Residential-coal	3.20372	3.33454	4.02613	3.72534	5.85113
8 Western Africa	Residential-other fuels	213.605	221.37	230.238	236.22	246.149
8 Western Africa	Road transport - diesel	16.5373	16.387	23.808	29.879	39.2028
8 Western Africa	Road transport - other	4.82938	4.63178	5.40749	6.78434	7.97942
8 Western Africa	Non-road transport - diesel	2.25673	2.87688	3.93259	4.36949	5.87168
8 Western Africa	Non-road transport - other	0.05433	0.09664	0.24983	0.41763	0.09849
8 Western Africa	Other	30.3723	36.737	42.287	48.164	52.7968
8 Western Africa	Sum	752.425	836.444	942.492	1029.96	1134.73
10 South Africa	Power - coal	0.55259	0.53403	0.5659	0.42362	0.42073
10 South Africa	Power - other fuels	0.33238	0.33668	0.38483	0.49577	0.51941
10 South Africa	Industry	1.66555	1.67417	1.20274	1.23925	1.12365
10 South Africa	Coke ovens	1.70964	1.35254	0.72161	0.60464	0.78136
10 South Africa	Fossil fuel production	0	0	0.214	0.2303	0
10 South Africa	Residential-biomass	18.6357	20.3927	22.5264	24.1394	25.5415
10 South Africa	Residential-coal	8.13815	9.73671	5.55427	17.1313	12.2614
10 South Africa	Residential-other fuels	11.264	9.59965	8.08244	6.82565	4.95429
10 South Africa	Road transport - diesel	7.73061	7.27566	9.72014	14.1167	17.7813
10 South Africa	Road transport - other	1.03634	1.03254	0.77883	0.84093	0.71722
10 South Africa	Non-road transport - diesel	3.08165	3.81417	3.40812	3.23732	3.30767
10 South Africa	Non-road transport - other	0.03984	0.06012	0.07928	0.04646	0.03453
10 South Africa	Other	2.92117	3.13329	3.64938	4.16955	4.65593
10 South Africa	Sum	57.1076	58.9422	56.8879	73.501	72.099
11 Western Europe	Power - coal	0.98611	0.79811	0.72989	0.42047	0.2849
11 Western Europe	Power - other fuels	4.94169	5.63245	6.40438	4.59327	1.90463
11 Western Europe	Industry	5.3054	4.25987	2.93935	2.20925	1.60619
11 Western Europe	Coke ovens	2.42586	1.5618	0.9322	0.7909	0.56218
11 Western Europe	Fossil fuel production	2.20582	2.95992	1.88726	1.48916	0.9324
11 Western Europe	Residential-biomass	68.0895	65.6345	62.7877	63.999	68.0688
11 Western Europe	Residential-coal	13.4437	8.58656	8.53923	5.4732	6.10631
11 Western Europe	Residential-other fuels	3.26742	3.16636	2.55421	2.237	1.75587
11 Western Europe	Road transport - diesel	123.33	160.488	144.985	139.324	109.473
11 Western Europe	Road transport - other	5.23961	4.05575	4.4283	4.33618	3.95042
11 Western Europe	Non-road transport - diesel	66.0384	59.9382	56.1527	50.4026	37.9958
11 Western Europe	Non-road transport - other	1.18923	1.03391	0.97108	0.93514	0.85281
11 Western Europe	Other	34.8207	17.0725	13.6971	11.0237	12.2256
11 Western Europe	Sum	331.284	335.188	307.009	287.234	245.719
12 Central Europe	Power - coal	0.65105	0.38853	0.20722	0.13999	0.08493
12 Central Europe	Power - other fuels	1.04646	0.60863	0.56005	0.60416	0.35278
12 Central Europe	Industry	2.66175	1.9692	0.93495	0.65073	0.48367
12 Central Europe	Coke ovens	4.0033	2.70847	1.66911	0.90417	0.52003
12 Central Europe	Fossil fuel production	0.79421	0.55105	0.48811	0.65834	0.62336
12 Central Europe	Residential-biomass	21.0489	31.4304	44.1079	46.0828	53.175
12 Central Europe	Residential-coal	47.7877	35.3308	26.9886	31.1939	40.1662
12 Central Europe	Residential-other fuels	0.82184	0.35126	0.34871	0.36437	0.1844
12 Central Europe	Road transport - diesel	18.3749	16.2544	16.7083	22.5487	21.7291
12 Central Europe	Road transport - other	0.53621	0.3932	0.49573	0.51544	0.50769
12 Central Europe	Non-road transport - diesel	14.0211	10.5388	9.33525	7.78739	7.83066
12 Central Europe	Non-road transport - other	0.24792	0.13146	0.10003	0.1144	0.08262
12 Central Europe	Other	14.3061	11.7982	10.4148	9.3609	8.54944
12 Central Europe	Sum	126.301	112.454	112.359	120.925	134.29
13 Turkey	Power - coal	0.00737	0.011	0.01236	0.02413	0.03106
13 Turkey	Power - other fuels	0.02945	0.0489	0.11049	0.08293	0.04954
13 Turkey	Industry	0.95616	0.71341	0.61202	0.61803	0.44228
13 Turkey	Coke ovens	1.91509	1.32333	1.08596	0.8177	0.55759
13 Turkey	Fossil fuel production	0.20745	0.1917	0.15085	0.12594	0.13866
13 Turkey	Residential-biomass	28.5705	26.8904	25.1247	20.6636	16.5921
13 Turkey	Residential-coal	11.873	9.76908	7.64071	9.74479	28.6503
13 Turkey	Residential-other fuels	0.35907	0.3772	0.1894	0.08985	0.05191
13 Turkey	Road transport - diesel	7.04993	8.08274	5.95505	6.07651	6.41
13 Turkey	Road transport - other	0.15762	0.21218	0.26945	0.23745	0.19375
13 Turkey	Non-road transport - diesel	4.2114	5.39294	5.71939	6.43406	8.24794
13 Turkey	Non-road transport - other	0.02288	0.00303	0.07064	0.06443	0.00561
13 Turkey	Other	4.97083	5.51987	5.63115	5.71502	5.75474
13 Turkey	Sum	60.3308	58.5358	52.5722	50.6944	67.1255
14 Ukraine+	Power - coal	0.76247	0.47015	0.3039	0.26779	0.25346
14 Ukraine+	Power - other fuels	1.02308	0.30723	0.16823	0.10508	0.11046
14 Ukraine+	Industry	2.60845	1.20242	0.81141	0.73457	0.68023
14 Ukraine+	Coke ovens	9.3555	5.61636	5.3059	5.18305	4.40418
14 Ukraine+	Fossil fuel production	1.20543	0.94675	0.83652	0.97292	0.45918
14 Ukraine+	Residential-biomass	1.93945	2.23319	3.15394	3.4379	6.03005
14 Ukraine+	Residential-coal	34.2719	25.3695	14.6169	10.9005	3.48862
14 Ukraine+	Residential-other fuels	0.92701	0.07498	0.01516	0.03469	0.02991
14 Ukraine+	Road transport - diesel	10.984	5.56735	4.36709	4.06041	5.54247
14 Ukraine+	Road transport - other	1.09894	1.62521	1.39008	1.48017	1.40936
14 Ukraine+	Non-road transport - diesel	14.0274	7.60795	5.43504	5.95746	5.23591
14 Ukraine+	Non-road transport - other	1.1257	0.00937	0.02114	0.01332	0.00547
14 Ukraine+	Other	8.40551	8.25135	8.2017	8.27375	8.40687
14 Ukraine+	Sum	87.7349	59.2818	44.627	41.4217	36.0562
15 Asia-Stan	Power - coal	0.09633	0.06764	0.056	0.066	0.05526
15 Asia-Stan	Power - other fuels	0.27353	0.20825	0.20191	0.25792	0.18669
15 Asia-Stan	Industry	1.25623	0.3816	0.19913	0.25599	0.49108
15 Asia-Stan	Coke ovens	0.23587	1.19648	1.45575	1.40546	1.40647
15 Asia-Stan	Fossil fuel production	6.42195	6.357	10.4286	15.8723	10.3605
15 Asia-Stan	Residential-biomass	0.4332	0.30413	0.28482	0.06546	0.22229
15 Asia-Stan	Residential-coal	12.7686	0.82709	0.91911	0.63072	22.0171
15 Asia-Stan	Residential-other fuels	1.8787	0.76661	0.54337	0.69565	0.7758
15 Asia-Stan	Road transport - diesel	4.96227	1.71638	2.63994	2.44147	3.59823
15 Asia-Stan	Road transport - other	4.40546	3.00333	3.10517	3.32949	3.65388
15 Asia-Stan	Non-road transport - diesel	9.27853	6.21348	7.01251	6.74321	5.08699
15 Asia-Stan	Non-road transport - other	0	0	0.02846	0.02291	0.02261
15 Asia-Stan	Other	8.10757	6.64824	6.1312	6.51284	6.73497
15 Asia-Stan	Sum	50.1183	27.6902	33.006	38.2994	54.6118
16 Russia+	Power - coal	1.38061	1.08915	0.92129	0.94603	0.54356
16 Russia+	Power - other fuels	2.46812	1.47813	1.61768	1.59037	1.31072
16 Russia+	Industry	6.62796	3.74517	2.98674	2.47777	2.51613
16 Russia+	Coke ovens	20.4101	10.9311	10.365	9.63328	10.4638
16 Russia+	Fossil fuel production	120.159	67.0384	70.7963	102.593	62.1283
16 Russia+	Residential-biomass	31.0843	16.5217	12.1473	6.92452	5.81289
16 Russia+	Residential-coal	115.384	65.8248	59.2188	19.6732	11.4038
16 Russia+	Residential-other fuels	2.23618	1.40349	0.76156	0.28905	0.34699
16 Russia+	Road transport - diesel	38.2344	12.942	19.8809	22.554	24.4683
16 Russia+	Road transport - other	17.3456	14.1677	13.0531	15.7592	16.5254
16 Russia+	Non-road transport - diesel	55.5783	28.3562	18.9884	15.8656	13.4588
16 Russia+	Non-road transport - other	0.42688	0.12883	0.10245	0.07515	0.12558
16 Russia+	Other	28.0972	27.7638	27.628	27.623	27.5971
16 Russia+	Sum	439.433	251.391	238.468	226.004	176.701
17 Middle East	Power - coal	0.01447	0.02412	0.03128	0.02679	0.0149
17 Middle East	Power - other fuels	2.1601	2.89484	3.92327	5.46389	9.94088
17 Middle East	Industry	12.1289	11.5311	10.2471	9.57574	8.77296
17 Middle East	Coke ovens	0.528	0.7255	0.71458	0.53553	0.61016
17 Middle East	Fossil fuel production	48.9107	42.3353	52.2718	51.457	50.8598
17 Middle East	Residential-biomass	1.27449	1.66454	1.32476	2.50188	2.2072
17 Middle East	Residential-coal	0	0.14152	0.13779	0.06604	0.06413
17 Middle East	Residential-other fuels	1.23486	1.3105	1.38044	1.35222	0.73863
17 Middle East	Road transport - diesel	67.9009	78.3837	90.2697	111.645	122.779
17 Middle East	Road transport - other	10.2981	13.2439	14.9428	19.3713	22.092
17 Middle East	Non-road transport - diesel	19.4207	19.6817	22.8629	28.207	30.6979
17 Middle East	Non-road transport - other	0.16618	0.11193	0.14036	0.0993	0.08378
17 Middle East	Other	9.70403	10.8464	11.3691	12.3106	13.297
17 Middle East	Sum	173.741	182.895	209.616	242.612	262.158
18 India	Power - coal	1.32634	2.15958	2.44982	2.12473	1.8831
18 India	Power - other fuels	2.43148	3.82154	6.07558	6.10663	8.55211
18 India	Industry	49.6948	62.1247	74.9257	90.3373	105.568
18 India	Coke ovens	5.25685	5.57417	4.79266	6.91768	10.3869
18 India	Fossil fuel production	1.76022	1.96066	1.68024	1.45176	1.44915
18 India	Residential-biomass	336.055	352.409	297.633	321.769	351.934
18 India	Residential-coal	42.4973	44.6445	32.4059	38.0623	63.1215
18 India	Residential-other fuels	284.317	296.498	290.663	269.871	258.015
18 India	Road transport - diesel	52.3195	80.3925	76.3751	76.3847	120.232
18 India	Road transport - other	5.9873	6.15379	7.16631	5.4192	6.70416
18 India	Non-road transport - diesel	7.6423	9.42714	19.492	20.1891	24.0696
18 India	Non-road transport - other	0.22328	0.14761	0.00735	0.00735	0.01551
18 India	Other	64.9825	67.2135	71.7056	70.0843	70.6773
18 India	Sum	854.493	932.527	885.373	908.725	1022.61
19 Korea	Power - coal	0.75192	0.60939	0.43246	0.52345	0.41567
19 Korea	Power - other fuels	0.22507	0.35866	0.50318	0.5814	0.60169
19 Korea	Industry	3.60657	2.8187	2.8029	2.11346	1.97603
19 Korea	Coke ovens	5.43543	1.12396	1.28348	1.12995	1.21622
19 Korea	Fossil fuel production	0	0	0	0	0
19 Korea	Residential-biomass	23.2702	24.2315	24.2351	24.6874	24.0684
19 Korea	Residential-coal	68.5582	10.8413	4.49638	21.569	19.3378
19 Korea	Residential-other fuels	2.0576	1.47811	1.06574	1.6039	1.65872
19 Korea	Road transport - diesel	19.6884	27.4256	21.2921	20.587	14.1346
19 Korea	Road transport - other	0.86603	0.8774	0.98448	1.08044	1.07023
19 Korea	Non-road transport - diesel	4.92227	7.77829	7.45889	3.31388	2.71157
19 Korea	Non-road transport - other	0.07369	0.13692	0.18892	0.15746	0.18125
19 Korea	Other	4.29506	4.77459	5.07668	5.23324	5.38179
19 Korea	Sum	133.75	82.4545	69.8203	82.5806	72.754
20 China+	Power - coal	17.3745	18.4979	15.0381	10.2715	7.44632
20 China+	Power - other fuels	2.21906	2.80075	3.44924	5.25266	5.73189
20 China+	Industry	48.477	69.2779	62.676	63.333	41.1768
20 China+	Coke ovens	52.1123	80.996	109.432	190.006	222.693
20 China+	Fossil fuel production	3.19996	3.37037	4.26381	5.04967	3.62029
20 China+	Residential-biomass	463.689	469.456	464.189	452.513	431.28
20 China+	Residential-coal	571.487	487.712	734.822	759.229	801.641
20 China+	Residential-other fuels	17.9195	16.6818	15.956	15.3264	14.8071
20 China+	Road transport - diesel	14.6573	22.7756	82.7463	133.237	199.434
20 China+	Road transport - other	8.1319	12.6034	15.4607	19.7996	26.2765
20 China+	Non-road transport - diesel	41.1173	50.4542	40.993	64.4492	66.6298
20 China+	Non-road transport - other	0.39614	0.52072	0.35696	0.57524	0.63532
20 China+	Other	107.752	112.362	106.191	104.004	103.405
20 China+	Sum	1348.53	1347.51	1655.57	1823.05	1924.78
21 Southeastern Asia	Power - coal	0.0472	0.03915	0.07855	0.10884	0.19053
21 Southeastern Asia	Power - other fuels	1.06747	1.60437	2.02235	1.33191	1.38385
21 Southeastern Asia	Industry	12.1559	13.9453	14.8106	14.3973	15.4621
21 Southeastern Asia	Coke ovens	0	0	0	0	0
21 Southeastern Asia	Fossil fuel production	3.03084	3.60848	4.12355	4.90077	4.36771
21 Southeastern Asia	Residential-biomass	119.645	113.717	116.394	124.808	132.436
21 Southeastern Asia	Residential-coal	1.8	3.11636	3.62002	5.72564	7.15683
21 Southeastern Asia	Residential-other fuels	97.0146	70.4998	56.4395	47.9648	37.7515
21 Southeastern Asia	Road transport - diesel	34.6827	56.5331	63.701	79.5025	79.5346
21 Southeastern Asia	Road transport - other	1.7669	2.60038	3.03786	3.58358	5.30342
21 Southeastern Asia	Non-road transport - diesel	10.5485	13.495	18.5264	22.0891	24.0816
21 Southeastern Asia	Non-road transport - other	0.05619	0.10746	0.13205	0.24122	0.19747
21 Southeastern Asia	Other	18.1928	20.0992	21.4532	23.5444	25.4042
21 Southeastern Asia	Sum	300.008	299.366	304.339	328.198	333.27
22 Indonesia+	Power - coal	0.04831	0.05284	0.09572	0.11772	0.15143
22 Indonesia+	Power - other fuels	1.06012	1.69131	2.2864	4.05846	4.59151
22 Indonesia+	Industry	4.82061	5.52404	5.60578	4.46641	4.38915
22 Indonesia+	Coke ovens	0	0	0	0	0
22 Indonesia+	Fossil fuel production	6.87902	8.13076	7.22796	4.82979	3.72432
22 Indonesia+	Residential-biomass	109.43	116.873	124.49	136.351	147.216
22 Indonesia+	Residential-coal	0.0217	0.07428	0.07661	0.06892	0.06723
22 Indonesia+	Residential-other fuels	84.192	79.6269	74.7189	68.9987	54.7347
22 Indonesia+	Road transport - diesel	15.1727	22.6786	29.863	24.7411	37.9855
22 Indonesia+	Road transport - other	0.72838	1.12333	1.55676	2.06796	2.78152
22 Indonesia+	Non-road transport - diesel	5.21481	7.48446	9.84444	12.1508	12.4937
22 Indonesia+	Non-road transport - other	0.04912	0.10254	0.12702	0.11932	0.03822
22 Indonesia+	Other	15.3383	16.8932	18.8206	20.6845	22.1826
22 Indonesia+	Sum	242.955	260.255	274.714	278.654	290.356
23 Japan	Power - coal	0.1064	0.08205	0.04488	0.03602	0.02581
23 Japan	Power - other fuels	1.26	1.04757	1.21493	1.83635	1.81727
23 Japan	Industry	1.69138	1.42246	0.94295	0.74132	0.36975
23 Japan	Coke ovens	1.24873	0.98199	0.84138	0.69297	0.71142
23 Japan	Fossil fuel production	0.00177	0.00179	0.00125	0.00118	0.00094
23 Japan	Residential-biomass	0.34439	0.25211	0.16048	0.08429	0.08233
23 Japan	Residential-coal	0.44618	0.25018	0.04331	0.03788	0.03664
23 Japan	Residential-other fuels	0.66298	0.75568	0.65061	0.52547	0.28862
23 Japan	Road transport - diesel	41.9417	48.9468	38.9424	25.9776	12.9037
23 Japan	Road transport - other	2.99151	3.2222	3.81448	3.42328	2.95331
23 Japan	Non-road transport - diesel	13.4146	14.3781	16.2678	13.781	7.57882
23 Japan	Non-road transport - other	0.63679	0.70474	0.53033	0.37093	0.2445
23 Japan	Other	2.23041	2.2219	2.34022	2.34893	2.40782
23 Japan	Sum	66.9769	74.2677	65.7951	49.8572	29.421
24 Oceania	Power - coal	0.07401	0.07913	0.04972	0.05112	0.01223
24 Oceania	Power - other fuels	0.02123	0.01596	0.02193	0.04715	0.08412
24 Oceania	Industry	0.24805	0.25582	0.2355	0.18914	0.1486
24 Oceania	Coke ovens	0.51735	0.16896	0.09822	0.09822	0.10014
24 Oceania	Fossil fuel production	1.00476	0.68535	0.35562	0.27466	0.22749
24 Oceania	Residential-biomass	7.73841	8.48885	8.18042	6.32801	5.89601
24 Oceania	Residential-coal	0.60182	0.17212	0.1297	0.18807	0.15329
24 Oceania	Residential-other fuels	0.02534	0.01822	0.01625	0.02989	0.026
24 Oceania	Road transport - diesel	8.20778	8.97588	10.4862	10.7408	9.82775
24 Oceania	Road transport - other	1.19696	1.24587	1.29622	1.36289	1.24289
24 Oceania	Non-road transport - diesel	5.83919	6.5229	7.68174	8.75404	8.76245
24 Oceania	Non-road transport - other	0.03249	0.02879	0.02877	0.05663	0.05683
24 Oceania	Other	4.36992	5.36185	6.82105	6.54546	6.11127
24 Oceania	Sum	29.8773	32.0197	35.4013	34.6661	32.6491
25 Rest South Asia	Power - coal	0	0	0.00111	0.00168	0.00297
25 Rest South Asia	Power - other fuels	0.55152	0.88279	1.55683	2.19116	2.73001
25 Rest South Asia	Industry	13.8572	17.3432	20.3748	22.9534	26.3938
25 Rest South Asia	Coke ovens	0.35974	0.29083	0.24524	0.23782	0.23497
25 Rest South Asia	Fossil fuel production	0.45551	0.57727	0.6795	0.79137	1.01552
25 Rest South Asia	Residential-biomass	120.17	130.794	146.027	158.565	170.298
25 Rest South Asia	Residential-coal	0.27798	0.05314	0.07602	0.09068	0.11415
25 Rest South Asia	Residential-other fuels	116.747	103.746	94.9991	85.9371	73.8667
25 Rest South Asia	Road transport - diesel	15.0123	23.0244	30.853	32.3974	37.4357
25 Rest South Asia	Road transport - other	2.4581	2.51926	2.22898	2.63731	4.55826
25 Rest South Asia	Non-road transport - diesel	3.09436	4.12087	4.79029	5.70264	4.59959
25 Rest South Asia	Non-road transport - other	0	0.01259	0.01392	0.03521	0.06169
25 Rest South Asia	Other	15.0527	20.4189	22.9098	24.9648	26.4041
25 Rest South Asia	Sum	288.037	303.783	324.755	336.505	347.716
Global	Power - coal	25.6893	26.5288	21.8808	16.3136	12.09
Global	Power - other fuels	26.7745	29.8395	38.9715	45.9483	56.6404
Global	Industry	205.229	236.754	245.822	264.925	266.471
Global	Coke ovens	118.746	125.271	147.828	226.102	263.626
Global	Fossil fuel production	274.96	233.227	247.639	271.248	208.882
Global	Residential-biomass	1976.96	2062.06	2096.57	2223.59	2358.52
Global	Residential-coal	961.794	719.777	913.762	926.175	1022.93
Global	Residential-other fuels	920.523	863.846	819.075	768.13	712.219
Global	Road transport - diesel	728.576	883.666	994.54	1088.97	1169.21
Global	Road transport - other	117.28	125.348	132.3	146.85	164.383
Global	Non-road transport - diesel	397.117	357.485	361.483	394.448	388.087
Global	Non-road transport - other	10.0826	6.9098	6.73734	8.06803	6.73453
Global	Other	446.873	459.017	477.754	491.451	504.269
Global	Total	6210.61	6129.73	6504.36	6872.23	7134.06

## Sheet: OC
Region	Sector	1990	1995	2000	2005	2010
1 Canada	Power - coal	0.04597	0.04375	0.03158	0.02819	0.01527
1 Canada	Power - other fuels	0.0543	0.04916	0.11618	0.16468	0.16002
1 Canada	Industry	0.37639	0.36884	0.30444	0.30211	0.23156
1 Canada	Coke ovens	0.66361	0.12708	0.07218	0.06842	0.06793
1 Canada	Fossil fuel production	0.11094	0.14221	0.12163	0.08523	0.1351
1 Canada	Residential-biomass	40.2923	41.9745	44.1955	42.1964	47.6814
1 Canada	Residential-coal	0.29142	0.35121	0.24535	0.2372	0.23724
1 Canada	Residential-other fuels	0.11838	0.11999	0.13325	0.14701	0.10614
1 Canada	Road transport - diesel	6.57419	7.11135	5.27101	4.80445	4.03278
1 Canada	Road transport - other	6.80148	8.81459	8.83377	7.83077	5.57885
1 Canada	Non-road transport - diesel	7.09803	7.61832	8.49	6.96424	6.54944
1 Canada	Non-road transport - other	0.32322	0.41538	0.40439	0.5066	0.60066
1 Canada	Other	8.93545	9.60051	9.24137	8.72863	8.23874
1 Canada	Sum	71.6857	76.7369	77.4606	72.0639	73.6351
2 USA	Power - coal	0.68023	0.71673	0.28288	0.23077	0.05649
2 USA	Power - other fuels	0.63061	0.62315	1.17664	1.75337	1.24563
2 USA	Industry	1.6259	1.3679	1.55784	1.26354	1.1179
2 USA	Coke ovens	4.48378	0.83399	0.42026	0.30979	0.30269
2 USA	Fossil fuel production	0.33308	0.29564	0.15784	0.14388	0.13472
2 USA	Residential-biomass	157.234	159.487	116.824	120.362	97.4882
2 USA	Residential-coal	24.5007	10.5944	8.03963	1.23998	0.19465
2 USA	Residential-other fuels	0.87166	0.87025	0.87494	0.84293	0.78572
2 USA	Road transport - diesel	61.1247	71.9149	59.6245	55.1766	32.7018
2 USA	Road transport - other	69.2803	73.3186	69.1918	61.7814	47.3177
2 USA	Non-road transport - diesel	41.3947	29.7585	28.5667	31.8261	27.5418
2 USA	Non-road transport - other	16.1651	9.74721	9.27624	12.4577	8.93204
2 USA	Other	69.9711	74.9482	92.2255	91.6434	90.2464
2 USA	Sum	448.296	434.476	388.219	379.032	308.066
3 Mexico	Power - coal	0.00815	0.01366	0.01153	0.01303	0.01053
3 Mexico	Power - other fuels	0.52312	0.55429	1.01738	1.21309	1.24685
3 Mexico	Industry	5.35376	3.48018	4.03687	3.56081	3.49531
3 Mexico	Coke ovens	2.65231	2.33404	1.94298	1.14513	1.43952
3 Mexico	Fossil fuel production	0.22923	0.22923	0.3805	0.19633	0.52519
3 Mexico	Residential-biomass	67.8261	68.5315	69.9126	65.3659	63.7482
3 Mexico	Residential-coal	0	0	0	0	0
3 Mexico	Residential-other fuels	0.04419	0.03399	0.02718	0.02272	0.01707
3 Mexico	Road transport - diesel	16.1139	15.2224	14.2807	12.0819	11.1892
3 Mexico	Road transport - other	29.3331	29.6367	26.3285	25.5976	23.1737
3 Mexico	Non-road transport - diesel	3.49181	4.00385	4.48271	4.75396	5.62803
3 Mexico	Non-road transport - other	0.3528	0.28952	0.68104	0.57857	0.58998
3 Mexico	Other	35.9646	38.0072	40.8012	43.3383	43.581
3 Mexico	Sum	161.893	162.337	163.903	157.867	154.645
4 Rest Central America	Power - coal	5e-05	0.00019	0.00055	0.0009	0.00103
4 Rest Central America	Power - other fuels	0.39629	0.47034	0.63427	0.8762	1.28941
4 Rest Central America	Industry	4.29573	3.02141	3.23692	2.035	1.62118
4 Rest Central America	Coke ovens	0	0	0	0	0
4 Rest Central America	Fossil fuel production	0.27373	0.28368	0.34563	0.39385	0.34502
4 Rest Central America	Residential-biomass	79.9949	83.5082	88.6827	96.6932	108.835
4 Rest Central America	Residential-coal	0.19708	0.37168	0.32599	0.31792	0.96278
4 Rest Central America	Residential-other fuels	0.04084	0.02374	0.02549	0.03253	0.02076
4 Rest Central America	Road transport - diesel	4.4396	6.60214	9.17229	9.92063	10.7553
4 Rest Central America	Road transport - other	9.04596	8.712	6.16167	5.38306	3.11179
4 Rest Central America	Non-road transport - diesel	3.49619	2.46607	3.16927	2.77939	2.64756
4 Rest Central America	Non-road transport - other	0.09286	0.23519	0.34532	0.59786	0.78048
4 Rest Central America	Other	42.2253	43.736	46.4493	50.2244	50.6607
4 Rest Central America	Sum	144.499	149.431	158.549	169.255	181.031
5 Brazil	Power - coal	0.00318	0.00358	0.01284	0.01731	0.00851
5 Brazil	Power - other fuels	1.24745	1.50761	0.97754	1.04395	2.47962
5 Brazil	Industry	17.6167	18.9142	18.4408	23.6844	27.7239
5 Brazil	Coke ovens	8.84473	9.40461	7.37962	6.16316	6.98075
5 Brazil	Fossil fuel production	0.14187	0.14187	0.29381	0.32317	0.22994
5 Brazil	Residential-biomass	104.506	81.7636	83.5823	105.982	99.9929
5 Brazil	Residential-coal	0.62681	0.52876	0.46825	0.4514	0.5331
5 Brazil	Residential-other fuels	0.17948	0.16519	0.14654	0.12467	0.09768
5 Brazil	Road transport - diesel	31.9139	38.4831	41.1892	33.9251	29.9284
5 Brazil	Road transport - other	6.54515	7.40987	7.81756	8.83128	10.7554
5 Brazil	Non-road transport - diesel	5.41024	6.88721	7.11494	8.129	10.1287
5 Brazil	Non-road transport - other	0.03924	0.04363	0.10422	0.10174	0.08784
5 Brazil	Other	73.4648	92.9083	107.863	122.167	124.703
5 Brazil	Sum	250.539	258.162	275.391	310.945	313.649
6 Rest South America	Power - coal	0.01252	0.0118	0.00925	0.00517	0.00734
6 Rest South America	Power - other fuels	0.53856	0.63999	0.73501	1.13427	1.61441
6 Rest South America	Industry	6.27424	6.98082	7.1061	5.3817	5.31964
6 Rest South America	Coke ovens	2.15277	1.88853	2.28161	1.687	3.37893
6 Rest South America	Fossil fuel production	1.0321	1.16862	0.97766	0.93598	0.87049
6 Rest South America	Residential-biomass	130.013	128.037	114.501	109.671	126.817
6 Rest South America	Residential-coal	1.84542	2.00337	0.61861	0.71585	0.5983
6 Rest South America	Residential-other fuels	0.06524	0.06696	0.06638	0.06461	0.07165
6 Rest South America	Road transport - diesel	22.0036	30.8987	34.6957	36.2209	38.4341
6 Rest South America	Road transport - other	39.7602	41.6888	21.8399	18.0875	13.058
6 Rest South America	Non-road transport - diesel	4.99875	7.31661	7.83183	10.7634	12.4574
6 Rest South America	Non-road transport - other	0.49314	0.66849	0.51281	0.6248	0.78917
6 Rest South America	Other	87.6023	107.882	123.845	138.629	140.803
6 Rest South America	Sum	296.792	329.252	315.02	323.921	344.22
7 Northern Africa	Power - coal	0.00318	0.00586	0.0076	0.00758	0.0058
7 Northern Africa	Power - other fuels	0.44213	0.51076	0.72058	1.04094	1.50583
7 Northern Africa	Industry	5.88795	7.1126	8.32311	6.48276	6.70193
7 Northern Africa	Coke ovens	2.10716	2.09607	1.6173	1.76529	1.75121
7 Northern Africa	Fossil fuel production	4.79287	5.60012	4.34769	3.74326	3.38568
7 Northern Africa	Residential-biomass	13.6154	15.2719	17.6069	19.6461	21.1541
7 Northern Africa	Residential-coal	0	0	0	0.08221	0.10346
7 Northern Africa	Residential-other fuels	0.68812	0.65775	0.71198	0.55429	0.53258
7 Northern Africa	Road transport - diesel	17.8335	23.5485	31.1519	37.5854	51.406
7 Northern Africa	Road transport - other	33.7163	32.9545	22.6698	18.6744	22.5746
7 Northern Africa	Non-road transport - diesel	2.9793	3.09788	3.62471	6.31454	9.53705
7 Northern Africa	Non-road transport - other	0.34102	0.5115	0.63919	0.853	0.93035
7 Northern Africa	Other	62.2722	58.9864	63.8803	69.2836	71.9154
7 Northern Africa	Sum	144.679	150.354	155.301	166.033	191.504
8 Western Africa	Power - coal	0.01035	0.00957	0.00806	0.00647	0.00425
8 Western Africa	Power - other fuels	0.48423	0.54499	0.72746	1.00325	3.3864
8 Western Africa	Industry	9.65376	11.5495	13.4762	13.7753	14.6326
8 Western Africa	Coke ovens	0.63081	0.58786	0.58382	0.36073	0.63216
8 Western Africa	Fossil fuel production	8.83085	11.041	11.8219	10.2883	8.16876
8 Western Africa	Residential-biomass	1357.29	1538.14	1778.52	2014.23	2275.6
8 Western Africa	Residential-coal	8.0574	8.56026	10.0609	11.8544	13.4541
8 Western Africa	Residential-other fuels	3.96595	4.26013	4.95237	5.35529	5.95252
8 Western Africa	Road transport - diesel	12.0624	12.0073	17.3343	21.9732	28.8864
8 Western Africa	Road transport - other	37.6586	29.9827	26.749	32.4394	28.7782
8 Western Africa	Non-road transport - diesel	1.23246	1.55988	2.17805	2.38158	3.13296
8 Western Africa	Non-road transport - other	0.18111	0.32215	0.83278	1.39209	0.32831
8 Western Africa	Other	186.727	223.369	256.786	292.489	318.122
8 Western Africa	Sum	1626.78	1841.94	2124.03	2407.54	2701.08
10 South Africa	Power - coal	0.31646	0.31296	0.33489	0.2663	0.2682
10 South Africa	Power - other fuels	0.23013	0.23564	0.27296	0.34902	0.36534
10 South Africa	Industry	1.97307	2.40888	1.86988	1.62301	1.62363
10 South Africa	Coke ovens	2.79759	2.21325	1.18081	0.9894	1.27859
10 South Africa	Fossil fuel production	0	0	0.0428	0.04606	0
10 South Africa	Residential-biomass	56.9678	62.3386	68.8613	72.8391	76.0594
10 South Africa	Residential-coal	6.75778	8.08996	4.61905	14.2086	10.0616
10 South Africa	Residential-other fuels	0.08373	0.07863	0.07132	0.07134	0.0632
10 South Africa	Road transport - diesel	5.74692	5.47907	7.20501	10.2892	11.5617
10 South Africa	Road transport - other	9.43958	7.89453	4.6501	5.00864	2.90569
10 South Africa	Non-road transport - diesel	1.87606	2.38434	2.08042	1.94767	1.98156
10 South Africa	Non-road transport - other	0.13279	0.2004	0.26427	0.15488	0.11511
10 South Africa	Other	14.9965	16.1481	18.7239	21.2823	23.6465
10 South Africa	Sum	101.318	107.784	110.177	129.076	129.931
11 Western Europe	Power - coal	1.7212	0.72969	0.57185	0.3156	0.2273
11 Western Europe	Power - other fuels	3.41797	4.13054	5.33918	4.20589	2.58432
11 Western Europe	Industry	6.98163	5.30379	3.99269	2.74596	2.04582
11 Western Europe	Coke ovens	2.99473	1.90213	0.9857	0.83996	0.58217
11 Western Europe	Fossil fuel production	0.44116	0.59198	0.37745	0.29783	0.18648
11 Western Europe	Residential-biomass	169.809	162.101	137.552	121.752	116.817
11 Western Europe	Residential-coal	30.6873	18.4107	12.427	7.37934	7.89388
11 Western Europe	Residential-other fuels	1.29376	1.37377	1.42675	1.45317	1.3757
11 Western Europe	Road transport - diesel	74.4691	95.0884	64.7174	44.3058	27.2125
11 Western Europe	Road transport - other	31.7716	22.5048	21.7887	20.4779	19.119
11 Western Europe	Non-road transport - diesel	41.2801	37.1403	34.1116	30.7353	23.1186
11 Western Europe	Non-road transport - other	10.6599	10.5961	8.26318	6.38017	5.21039
11 Western Europe	Other	119.959	62.1921	51.41	42.7603	46.5638
11 Western Europe	Sum	495.487	422.065	342.963	283.65	252.937
12 Central Europe	Power - coal	1.97795	1.09502	0.62497	0.34294	0.25142
12 Central Europe	Power - other fuels	0.58794	0.3358	0.35762	0.41145	0.25642
12 Central Europe	Industry	4.18673	2.14863	1.21492	0.72671	0.56521
12 Central Europe	Coke ovens	6.19238	4.10987	2.44702	1.13703	0.55162
12 Central Europe	Fossil fuel production	0.15884	0.11021	0.09762	0.13167	0.12467
12 Central Europe	Residential-biomass	52.1059	78.3246	115.283	118.772	126.989
12 Central Europe	Residential-coal	83.1879	53.2405	40.7556	45.6349	57.0987
12 Central Europe	Residential-other fuels	0.12242	0.08625	0.10036	0.1119	0.0918
12 Central Europe	Road transport - diesel	11.0537	9.76955	9.51059	10.1231	8.07339
12 Central Europe	Road transport - other	2.9985	2.14148	2.77088	2.64965	2.60749
12 Central Europe	Non-road transport - diesel	8.75533	6.77567	5.88691	4.92014	4.96506
12 Central Europe	Non-road transport - other	3.04788	1.39	1.19197	1.10952	0.80682
12 Central Europe	Other	49.3404	41.2126	37.0177	33.6773	31.1899
12 Central Europe	Sum	223.716	200.74	217.259	219.749	233.571
13 Turkey	Power - coal	0.17035	0.11541	0.16253	0.12691	0.18589
13 Turkey	Power - other fuels	0.02078	0.0314	0.08617	0.08813	0.08333
13 Turkey	Industry	3.56781	2.77328	1.66891	1.4786	1.41367
13 Turkey	Coke ovens	3.13378	2.11875	1.71834	1.27362	0.8494
13 Turkey	Fossil fuel production	0.04149	0.03834	0.03017	0.02519	0.02773
13 Turkey	Residential-biomass	55.6975	52.438	44.0082	35.3906	26.8221
13 Turkey	Residential-coal	25.0517	20.8755	17.6111	20.1346	46.6604
13 Turkey	Residential-other fuels	0.02461	0.02819	0.02301	0.02897	0.0276
13 Turkey	Road transport - diesel	4.51928	5.13523	3.40931	2.67095	2.57821
13 Turkey	Road transport - other	0.95106	1.24315	1.35576	1.0317	0.76098
13 Turkey	Non-road transport - diesel	2.86323	3.69156	3.87992	4.43239	5.71365
13 Turkey	Non-road transport - other	0.07626	0.01011	0.23548	0.21476	0.0187
13 Turkey	Other	17.7837	19.7869	20.4731	21.0974	21.5406
13 Turkey	Sum	113.902	108.286	94.662	87.9938	106.682
14 Ukraine+	Power - coal	0.48932	0.26859	0.16884	0.14859	0.15079
14 Ukraine+	Power - other fuels	0.68133	0.2934	0.23305	0.19926	0.16694
14 Ukraine+	Industry	4.5472	1.84128	1.64908	1.5674	1.39264
14 Ukraine+	Coke ovens	15.309	8.99217	8.39568	8.07295	6.709
14 Ukraine+	Fossil fuel production	0.24109	0.18935	0.1673	0.19458	0.09184
14 Ukraine+	Residential-biomass	4.68226	5.24426	6.92802	7.30783	13.7814
14 Ukraine+	Residential-coal	65.494	39.7008	22.1451	15.7113	5.75688
14 Ukraine+	Residential-other fuels	0.1376	0.05279	0.05151	0.05901	0.05823
14 Ukraine+	Road transport - diesel	7.17825	3.65048	2.83036	2.4361	2.89944
14 Ukraine+	Road transport - other	4.85268	5.95576	4.99379	5.29591	4.95168
14 Ukraine+	Non-road transport - diesel	8.85448	4.79279	3.43058	3.78786	3.36298
14 Ukraine+	Non-road transport - other	3.75234	0.03123	0.07047	0.04441	0.01823
14 Ukraine+	Other	32.6612	31.4701	31.1767	31.8147	32.9467
14 Ukraine+	Sum	148.881	102.483	82.2404	76.6398	72.2868
15 Asia-Stan	Power - coal	0.08878	0.0487	0.04271	0.04714	0.04963
15 Asia-Stan	Power - other fuels	0.21193	0.17703	0.18866	0.24421	0.23067
15 Asia-Stan	Industry	3.33239	0.59213	0.35001	0.40371	0.52179
15 Asia-Stan	Coke ovens	0.39214	1.98914	2.42018	2.33658	2.33825
15 Asia-Stan	Fossil fuel production	1.28439	1.2714	2.08573	3.17446	2.07209
15 Asia-Stan	Residential-biomass	1.70085	1.19412	1.11828	0.25381	0.85021
15 Asia-Stan	Residential-coal	11.4936	1.91638	2.31975	1.25557	21.5798
15 Asia-Stan	Residential-other fuels	0.30675	0.16307	0.12328	0.13662	0.13807
15 Asia-Stan	Road transport - diesel	3.83051	1.34357	2.0808	1.94312	2.81914
15 Asia-Stan	Road transport - other	19.9911	17.8587	13.723	14.6159	15.3188
15 Asia-Stan	Non-road transport - diesel	4.93969	3.3263	4.12524	3.8725	2.91357
15 Asia-Stan	Non-road transport - other	0	0	0.09487	0.07636	0.07536
15 Asia-Stan	Other	42.5891	35.848	33.7977	35.8588	37.2015
15 Asia-Stan	Sum	90.1612	65.7286	62.4702	64.2188	86.1089
16 Russia+	Power - coal	1.84409	1.33837	1.4053	1.28823	0.81028
16 Russia+	Power - other fuels	2.1653	1.3904	1.5021	1.60558	1.52642
16 Russia+	Industry	11.4602	4.54156	3.74993	3.5379	3.73599
16 Russia+	Coke ovens	33.3983	17.7057	16.6664	15.3898	16.5938
16 Russia+	Fossil fuel production	24.0319	13.4077	14.1593	20.5186	12.4257
16 Russia+	Residential-biomass	84.1448	46.9527	35.2237	19.796	16.6814
16 Russia+	Residential-coal	125.197	72.1616	63.9152	21.1619	11.7893
16 Russia+	Residential-other fuels	0.41635	0.26365	0.22655	0.18209	0.18373
16 Russia+	Road transport - diesel	26.707	9.22203	13.7524	13.7406	12.9393
16 Russia+	Road transport - other	61.1761	49.6206	45.1385	52.4959	51.0526
16 Russia+	Non-road transport - diesel	35.924	18.4999	12.3643	10.096	8.2781
16 Russia+	Non-road transport - other	5.3602	1.49216	1.01312	0.85745	0.4186
16 Russia+	Other	97.4835	95.8464	95.2096	95.1688	95.0558
16 Russia+	Sum	509.309	332.443	304.326	255.839	231.491
17 Middle East	Power - coal	0.00821	0.01308	0.01592	0.01362	0.00754
17 Middle East	Power - other fuels	1.42587	1.85504	2.62345	3.76976	6.74857
17 Middle East	Industry	7.15633	7.34418	6.91249	5.30766	5.00166
17 Middle East	Coke ovens	0.8778	1.20614	1.18799	0.89032	1.01439
17 Middle East	Fossil fuel production	9.78214	8.46707	10.4544	10.2914	10.172
17 Middle East	Residential-biomass	4.56984	5.965	4.92121	9.36087	8.22636
17 Middle East	Residential-coal	0	0.12135	0.11815	0.05663	0.05584
17 Middle East	Residential-other fuels	0.1143	0.15977	0.18968	0.22043	0.20763
17 Middle East	Road transport - diesel	49.7665	57.7028	62.0277	66.0448	60.1929
17 Middle East	Road transport - other	55.4626	67.6984	60.4577	61.9679	51.7011
17 Middle East	Non-road transport - diesel	11.1164	11.5174	13.2141	15.81	17.3298
17 Middle East	Non-road transport - other	0.55395	0.37308	0.46787	0.331	0.27928
17 Middle East	Other	48.782	54.62	57.5785	62.4592	67.5958
17 Middle East	Sum	189.616	217.043	220.169	236.524	228.533
18 India	Power - coal	1.1292	1.83823	2.17077	2.1175	2.1698
18 India	Power - other fuels	1.69639	2.68226	4.28553	4.32296	6.06784
18 India	Industry	33.3809	39.1557	44.0384	38.6235	40.7644
18 India	Coke ovens	8.60212	9.12137	7.84253	11.3198	16.9968
18 India	Fossil fuel production	0.35204	0.39213	0.33605	0.29035	0.28983
18 India	Residential-biomass	1049.69	1100.78	1043.74	1117.39	1201.72
18 India	Residential-coal	38.0098	39.7223	28.3376	32.5688	53.097
18 India	Residential-other fuels	10.1282	11.7684	10.2239	6.11371	4.74534
18 India	Road transport - diesel	37.8328	58.2495	51.4573	51.0861	75.5753
18 India	Road transport - other	74.344	72.2583	74.498	37.1528	22.4049
18 India	Non-road transport - diesel	4.38343	5.36554	11.1213	11.4662	13.6522
18 India	Non-road transport - other	0.74428	0.49204	0.02451	0.02451	0.05169
18 India	Other	273.716	285.588	320.442	319.415	320.514
18 India	Sum	1534.01	1627.41	1598.52	1631.89	1758.05
19 Korea	Power - coal	0.38344	0.31181	0.2224	0.26726	0.21405
19 Korea	Power - other fuels	0.13866	0.20272	0.35641	0.42342	0.47484
19 Korea	Industry	2.69137	2.0952	2.05601	1.69546	1.45996
19 Korea	Coke ovens	9.02932	1.65609	1.89938	1.72249	1.76783
19 Korea	Fossil fuel production	0	0	0	0	0
19 Korea	Residential-biomass	84.5933	88.4445	88.4244	90.0841	87.8442
19 Korea	Residential-coal	57.8184	9.14368	3.77039	17.9835	16.1868
19 Korea	Residential-other fuels	0.35359	0.33629	0.32796	0.385	0.3881
19 Korea	Road transport - diesel	14.0127	19.2529	13.1953	9.97361	5.30224
19 Korea	Road transport - other	3.77666	3.82846	3.88398	3.91368	3.37974
19 Korea	Non-road transport - diesel	2.99632	4.88011	4.86122	2.04894	1.6072
19 Korea	Non-road transport - other	0.24565	0.45641	0.62973	0.52487	0.60418
19 Korea	Other	17.8358	19.734	20.9552	21.591	22.1758
19 Korea	Sum	193.875	150.342	140.582	150.613	141.405
20 China+	Power - coal	9.07844	9.78694	8.15804	5.49346	4.1797
20 China+	Power - other fuels	1.97017	2.76495	4.05297	5.73197	9.5544
20 China+	Industry	64.7733	114.995	109.264	142.214	154.738
20 China+	Coke ovens	88.1305	136.996	185.095	321.454	369.336
20 China+	Fossil fuel production	0.63999	0.67407	0.85276	1.00993	0.72406
20 China+	Residential-biomass	1973.2	1997.05	1969.71	1806.22	1734.1
20 China+	Residential-coal	462.601	394.277	590.3	611.056	646.128
20 China+	Residential-other fuels	0.85153	1.30351	1.9532	3.05799	5.24453
20 China+	Road transport - diesel	10.6605	16.5388	58.8233	88.2747	118.314
20 China+	Road transport - other	45.0948	68.5309	79.9422	74.6972	54.0096
20 China+	Non-road transport - diesel	27.0609	33.6001	24.9111	39.6085	40.6096
20 China+	Non-road transport - other	1.32046	1.73574	1.18986	1.91746	2.11775
20 China+	Other	463.755	486.654	466.646	464.493	462.089
20 China+	Sum	3149.14	3264.91	3500.9	3565.23	3601.14
21 Southeastern Asia	Power - coal	0.50729	0.65632	0.73169	0.74902	0.7368
21 Southeastern Asia	Power - other fuels	0.66468	1.04293	1.40473	1.02631	1.10864
21 Southeastern Asia	Industry	15.1859	21.5919	20.1492	15.4226	15.3214
21 Southeastern Asia	Coke ovens	0	0	0	0	0
21 Southeastern Asia	Fossil fuel production	0.60617	0.7217	0.82471	0.98015	0.87354
21 Southeastern Asia	Residential-biomass	370.297	351.646	359.613	373.181	389.499
21 Southeastern Asia	Residential-coal	1.44102	2.46353	2.85533	4.50104	5.62047
21 Southeastern Asia	Residential-other fuels	1.07599	0.93528	0.97978	0.92218	0.73153
21 Southeastern Asia	Road transport - diesel	24.7372	40.1656	43.7172	51.6441	48.8121
21 Southeastern Asia	Road transport - other	14.4716	21.114	22.8751	24.4495	35.7771
21 Southeastern Asia	Non-road transport - diesel	5.97225	7.59513	10.3933	12.3729	13.988
21 Southeastern Asia	Non-road transport - other	0.18729	0.3582	0.44016	0.80407	0.65825
21 Southeastern Asia	Other	90.7246	99.9006	102.889	112.252	119.072
21 Southeastern Asia	Sum	525.871	548.191	566.874	598.305	632.199
22 Indonesia+	Power - coal	0.02669	0.0302	0.05717	0.07238	0.09264
22 Indonesia+	Power - other fuels	0.73385	1.21065	1.61566	2.84911	3.23604
22 Indonesia+	Industry	6.24974	7.38991	7.01678	4.93486	4.60334
22 Indonesia+	Coke ovens	0	0	0	0	0
22 Indonesia+	Fossil fuel production	1.37581	1.62615	1.44559	0.96596	0.74486
22 Indonesia+	Residential-biomass	330.369	352.839	375.837	405.036	431.336
22 Indonesia+	Residential-coal	0.02374	0.08128	0.08383	0.07541	0.07356
22 Indonesia+	Residential-other fuels	0.63042	0.64014	0.66339	0.6641	0.62623
22 Indonesia+	Road transport - diesel	10.7943	16.0912	21.2045	17.5853	26.9894
22 Indonesia+	Road transport - other	5.75102	9.03907	11.8569	15.2735	19.3644
22 Indonesia+	Non-road transport - diesel	2.96513	4.38862	6.11341	7.42983	7.68503
22 Indonesia+	Non-road transport - other	0.16375	0.34179	0.42341	0.39772	0.12741
22 Indonesia+	Other	72.172	79.1418	87.4539	95.5391	100.303
22 Indonesia+	Sum	431.255	472.82	513.772	550.823	595.183
23 Japan	Power - coal	0.05616	0.03541	0.00956	0.00572	0.00415
23 Japan	Power - other fuels	0.67941	0.60334	0.84507	1.26474	1.34876
23 Japan	Industry	0.70099	0.49543	0.34623	0.30003	0.25424
23 Japan	Coke ovens	0.99015	0.785	0.65086	0.55448	0.57752
23 Japan	Fossil fuel production	0.00035	0.00036	0.00025	0.00024	0.00019
23 Japan	Residential-biomass	0.97962	0.68349	0.41255	0.20135	0.19322
23 Japan	Residential-coal	0.32574	0.18252	0.02142	0.01869	0.01806
23 Japan	Residential-other fuels	0.40071	0.45917	0.4714	0.47766	0.37662
23 Japan	Road transport - diesel	19.2091	22.1514	16.4094	10.6914	6.03639
23 Japan	Road transport - other	9.24593	9.12683	9.93353	7.85483	5.34106
23 Japan	Non-road transport - diesel	6.82097	7.31342	8.47536	7.13465	3.90052
23 Japan	Non-road transport - other	2.12262	2.34915	1.76777	1.23642	0.74205
23 Japan	Other	9.36091	9.34618	9.82413	9.86318	10.0797
23 Japan	Sum	50.8927	53.5317	49.1676	39.6033	28.8725
24 Oceania	Power - coal	0.07624	0.07329	0.0736	0.08058	0.06744
24 Oceania	Power - other fuels	0.02261	0.02206	0.03199	0.05035	0.09149
24 Oceania	Industry	0.20384	0.20167	0.17282	0.1504	0.12234
24 Oceania	Coke ovens	0.78914	0.17872	0.08325	0.08149	0.08309
24 Oceania	Fossil fuel production	0.20095	0.13707	0.07112	0.05493	0.0455
24 Oceania	Residential-biomass	21.7511	22.7937	20.9302	15.4098	13.5625
24 Oceania	Residential-coal	0.63073	0.31394	0.24641	0.21867	0.15734
24 Oceania	Residential-other fuels	0.01565	0.0167	0.01691	0.01909	0.02023
24 Oceania	Road transport - diesel	6.04921	5.76498	5.55435	4.47663	3.98068
24 Oceania	Road transport - other	4.04531	3.72011	3.35129	3.08409	2.66568
24 Oceania	Non-road transport - diesel	3.37077	3.7681	4.40234	5.31393	5.2131
24 Oceania	Non-road transport - other	0.10831	0.09598	0.0959	0.18878	0.18945
24 Oceania	Other	14.4418	17.6035	22.396	21.5335	20.1637
24 Oceania	Sum	51.7056	54.6898	57.4261	50.6622	46.3625
25 Rest South Asia	Power - coal	0	0	0.00072	0.00107	0.00189
25 Rest South Asia	Power - other fuels	0.3878	0.60799	1.05064	1.51826	1.85664
25 Rest South Asia	Industry	6.90914	7.88905	9.67872	10.2479	10.6245
25 Rest South Asia	Coke ovens	0.58867	0.47591	0.4013	0.38916	0.38449
25 Rest South Asia	Fossil fuel production	0.0911	0.11545	0.1359	0.15827	0.2031
25 Rest South Asia	Residential-biomass	381.813	415.196	463.951	502.884	532.597
25 Rest South Asia	Residential-coal	0.24068	0.06508	0.09971	0.12387	0.16829
25 Rest South Asia	Residential-other fuels	2.9671	2.44549	2.53395	2.36973	1.97625
25 Rest South Asia	Road transport - diesel	10.7921	16.5792	22.2093	23.2318	26.2414
25 Rest South Asia	Road transport - other	25.7298	24.8846	20.5015	21.5746	30.3275
25 Rest South Asia	Non-road transport - diesel	1.97373	2.57664	2.85879	3.38656	2.84053
25 Rest South Asia	Non-road transport - other	0	0.04198	0.04642	0.11736	0.20564
25 Rest South Asia	Other	70.0093	91.3534	104.135	113.789	118.973
25 Rest South Asia	Sum	501.503	562.231	627.603	679.791	726.4
Global	Power - coal	18.6374	17.4592	15.1152	11.6457	9.52675
Global	Power - other fuels	19.3515	22.4865	30.3513	36.2902	48.6288
Global	Industry	224.385	273.563	270.613	287.465	305.033
Global	Coke ovens	194.761	206.722	245.273	377.951	433.616
Global	Fossil fuel production	54.9921	46.6454	49.5278	54.2496	41.7764
Global	Residential-biomass	6593.14	6860.71	7050.34	7270.03	7618.39
Global	Residential-coal	944.479	683.176	809.384	806.988	898.429
Global	Residential-other fuels	24.8965	26.3091	26.3211	23.417	23.8389
Global	Road transport - diesel	489.425	587.973	610.824	620.206	646.862
Global	Road transport - other	601.243	619.937	571.313	530.169	476.036
Global	Non-road transport - diesel	241.254	220.324	217.688	238.276	234.783
Global	Non-road transport - other	46.4642	32.1975	29.015	31.4921	24.6777
Global	Other	2002.77	2095.88	2221.22	2319.1	2377.38
Global	Total	11455.8	11693.4	12147	12607.3	13139

## Sheet: OM
Region	Sector	1990	1995	2000	2005	2010
1 Canada	Power - coal	0.05977	0.05688	0.04105	0.03664	0.01985
1 Canada	Power - other fuels	0.07104	0.06442	0.1518	0.21494	0.20885
1 Canada	Industry	0.57192	0.57421	0.4649	0.44901	0.33914
1 Canada	Coke ovens	0.8627	0.16521	0.09383	0.08895	0.08832
1 Canada	Fossil fuel production	0.14422	0.18487	0.15812	0.11081	0.17563
1 Canada	Residential-biomass	72.5262	75.5541	79.5518	75.9534	85.8264
1 Canada	Residential-coal	0.38243	0.4585	0.32011	0.30904	0.309
1 Canada	Residential-other fuels	0.15389	0.15598	0.17322	0.19112	0.13799
1 Canada	Road transport - diesel	8.54645	9.24476	6.85231	6.24579	5.24262
1 Canada	Road transport - other	8.84192	11.459	11.4839	10.18	7.25251
1 Canada	Non-road transport - diesel	9.22744	9.90382	11.037	9.05351	8.51427
1 Canada	Non-road transport - other	0.42019	0.54	0.5257	0.65858	0.78086
1 Canada	Other	14.4212	15.5617	15.1408	14.2029	13.3224
1 Canada	Sum	116.229	123.923	125.995	117.695	122.218
2 USA	Power - coal	0.8843	0.93175	0.36774	0.30001	0.07343
2 USA	Power - other fuels	0.83647	0.82259	1.53514	2.28511	1.62428
2 USA	Industry	2.24605	1.93798	2.31706	1.86066	1.63563
2 USA	Coke ovens	5.82891	1.08418	0.54633	0.40273	0.3935
2 USA	Fossil fuel production	0.433	0.38433	0.2052	0.18704	0.17513
2 USA	Residential-biomass	283.022	287.076	210.283	216.652	175.479
2 USA	Residential-coal	31.8509	13.9615	10.5711	1.70164	0.31739
2 USA	Residential-other fuels	1.13316	1.13133	1.13742	1.0958	1.02143
2 USA	Road transport - diesel	79.4621	93.4894	77.5118	71.7296	42.5124
2 USA	Road transport - other	90.0644	95.3142	89.9494	80.3158	61.5131
2 USA	Non-road transport - diesel	53.8131	38.6861	37.1367	41.374	35.8044
2 USA	Non-road transport - other	21.0147	12.6714	12.0591	16.1951	11.6117
2 USA	Other	109.453	117.947	142.432	141.45	139.289
2 USA	Sum	680.042	665.438	586.052	575.55	471.45
3 Mexico	Power - coal	0.01059	0.01776	0.01499	0.01694	0.01369
3 Mexico	Power - other fuels	0.68005	0.72058	1.33019	1.5884	1.63229
3 Mexico	Industry	7.54779	4.89308	5.66183	5.01357	4.79928
3 Mexico	Coke ovens	3.448	3.03425	2.52587	1.48867	1.87138
3 Mexico	Fossil fuel production	0.298	0.298	0.49466	0.25523	0.68275
3 Mexico	Residential-biomass	122.087	123.357	125.843	117.659	114.747
3 Mexico	Residential-coal	0	0	0	0	0
3 Mexico	Residential-other fuels	0.05744	0.04419	0.03534	0.02954	0.0222
3 Mexico	Road transport - diesel	20.948	19.7891	18.5649	15.7065	14.546
3 Mexico	Road transport - other	38.133	38.5278	34.2271	33.2769	30.1258
3 Mexico	Non-road transport - diesel	4.53935	5.205	5.82752	6.18014	7.31644
3 Mexico	Non-road transport - other	0.45864	0.37638	0.88536	0.75215	0.76697
3 Mexico	Other	52.5468	55.0854	58.9656	62.8766	63.3739
3 Mexico	Sum	250.755	251.348	254.376	244.843	239.897
4 Rest Central America	Power - coal	6e-05	0.00024	0.00071	0.00117	0.00134
4 Rest Central America	Power - other fuels	0.59298	0.66364	0.86046	1.16377	1.70176
4 Rest Central America	Industry	7.4225	5.1105	5.52292	3.41078	2.70304
4 Rest Central America	Coke ovens	0	0	0	0	0
4 Rest Central America	Fossil fuel production	0.35585	0.36878	0.44932	0.512	0.44853
4 Rest Central America	Residential-biomass	143.991	150.315	159.629	174.048	195.903
4 Rest Central America	Residential-coal	0.35347	0.6665	0.58496	0.56847	1.73048
4 Rest Central America	Residential-other fuels	0.0531	0.03086	0.03314	0.04229	0.02699
4 Rest Central America	Road transport - diesel	5.77149	8.58278	11.924	12.8968	13.9819
4 Rest Central America	Road transport - other	11.7598	11.3256	8.01017	6.99798	4.04533
4 Rest Central America	Non-road transport - diesel	4.54505	3.20589	4.12005	3.61321	3.44183
4 Rest Central America	Non-road transport - other	0.12072	0.30575	0.44892	0.77722	1.01462
4 Rest Central America	Other	65.8038	67.6478	71.7008	77.8007	78.7155
4 Rest Central America	Sum	240.77	248.223	263.284	281.832	303.714
5 Brazil	Power - coal	0.00414	0.00465	0.0167	0.0225	0.01106
5 Brazil	Power - other fuels	1.96861	2.36657	1.33041	1.40267	3.86191
5 Brazil	Industry	29.0951	31.5041	31.2159	40.371	46.5882
5 Brazil	Coke ovens	11.4982	12.226	9.5935	8.0121	9.07498
5 Brazil	Fossil fuel production	0.18443	0.18443	0.38196	0.42012	0.29893
5 Brazil	Residential-biomass	188.11	147.174	150.448	190.768	179.987
5 Brazil	Residential-coal	1.12825	0.95176	0.84285	0.81252	0.95958
5 Brazil	Residential-other fuels	0.23333	0.21475	0.19051	0.16207	0.12699
5 Brazil	Road transport - diesel	41.488	50.0281	53.5459	44.1026	38.907
5 Brazil	Road transport - other	8.50869	9.63284	10.1628	11.4807	13.982
5 Brazil	Non-road transport - diesel	7.03331	8.95338	9.24942	10.5677	13.1673
5 Brazil	Non-road transport - other	0.05101	0.05672	0.13548	0.13226	0.1142
5 Brazil	Other	120.357	154.391	180.31	205.052	209.633
5 Brazil	Sum	409.66	417.689	447.424	513.307	516.713
6 Rest South America	Power - coal	0.01627	0.01534	0.01202	0.00672	0.00955
6 Rest South America	Power - other fuels	0.72195	0.86295	0.97958	1.49478	2.12044
6 Rest South America	Industry	9.52828	10.7499	11.1341	8.43436	8.41865
6 Rest South America	Coke ovens	2.79861	2.45509	2.9661	2.1931	4.39261
6 Rest South America	Fossil fuel production	1.34173	1.51921	1.27096	1.21678	1.13164
6 Rest South America	Residential-biomass	234.023	230.466	206.101	197.408	228.271
6 Rest South America	Residential-coal	2.92648	3.23672	0.92464	1.11667	0.95292
6 Rest South America	Residential-other fuels	0.08481	0.08705	0.08629	0.08399	0.09315
6 Rest South America	Road transport - diesel	28.6046	40.1684	45.1045	47.0872	49.9643
6 Rest South America	Road transport - other	51.6882	54.1954	28.3919	23.5138	16.9754
6 Rest South America	Non-road transport - diesel	6.49837	9.5116	10.1814	13.9925	16.1946
6 Rest South America	Non-road transport - other	0.64109	0.86903	0.66665	0.81223	1.02592
6 Rest South America	Other	136.94	171.429	198.189	223.112	227.13
6 Rest South America	Sum	475.813	525.566	506.008	520.472	556.68
7 Northern Africa	Power - coal	0.00413	0.00762	0.00988	0.00985	0.00753
7 Northern Africa	Power - other fuels	0.57477	0.66399	0.93675	1.35322	1.95758
7 Northern Africa	Industry	7.81109	9.44777	11.041	8.65055	8.93775
7 Northern Africa	Coke ovens	2.73931	2.72489	2.10249	2.29487	2.27657
7 Northern Africa	Fossil fuel production	6.23073	7.28015	5.652	4.86624	4.40138
7 Northern Africa	Residential-biomass	24.5077	27.4894	31.6924	35.363	38.0774
7 Northern Africa	Residential-coal	0	0	0	0.10687	0.18623
7 Northern Africa	Residential-other fuels	0.89456	0.85508	0.92558	0.72058	0.69235
7 Northern Africa	Road transport - diesel	23.1836	30.6131	40.4975	48.861	66.8278
7 Northern Africa	Road transport - other	43.8312	42.8408	29.4707	24.2767	29.347
7 Northern Africa	Non-road transport - diesel	3.87309	4.02725	4.71212	8.2089	12.3982
7 Northern Africa	Non-road transport - other	0.44332	0.66495	0.83095	1.10889	1.20945
7 Northern Africa	Other	93.6321	85.8573	92.7199	100.411	104.583
7 Northern Africa	Sum	207.726	212.472	220.591	236.232	270.903
8 Western Africa	Power - coal	0.01345	0.01243	0.01048	0.00841	0.00553
8 Western Africa	Power - other fuels	0.63544	0.71421	0.95251	1.30849	4.40594
8 Western Africa	Industry	16.7148	19.8622	23.2394	24.1161	25.629
8 Western Africa	Coke ovens	0.82006	0.76421	0.75896	0.46895	0.82181
8 Western Africa	Fossil fuel production	11.4801	14.3533	15.3685	13.3748	10.6194
8 Western Africa	Residential-biomass	2443.12	2768.66	3201.34	3625.61	4096.08
8 Western Africa	Residential-coal	13.8288	14.7272	17.2533	20.8518	22.8366
8 Western Africa	Residential-other fuels	5.15573	5.53817	6.43808	6.96187	7.73827
8 Western Africa	Road transport - diesel	15.6811	15.6095	22.5345	28.5652	37.5523
8 Western Africa	Road transport - other	48.9561	38.9776	34.7736	42.1713	37.4116
8 Western Africa	Non-road transport - diesel	1.6022	2.02785	2.83146	3.09605	4.07285
8 Western Africa	Non-road transport - other	0.23545	0.41879	1.08261	1.80972	0.42681
8 Western Africa	Other	273.548	329.997	379.758	432.711	472.184
8 Western Africa	Sum	2831.79	3211.66	3706.34	4201.05	4719.78
10 South Africa	Power - coal	0.4114	0.40684	0.43536	0.34619	0.34867
10 South Africa	Power - other fuels	0.29917	0.30634	0.35862	0.4556	0.4765
10 South Africa	Industry	2.98251	3.59226	2.90804	2.5885	2.5807
10 South Africa	Coke ovens	3.63687	2.87723	1.53506	1.28622	1.66216
10 South Africa	Fossil fuel production	0	0	0.05564	0.05988	0
10 South Africa	Residential-biomass	102.542	112.21	123.95	131.11	136.907
10 South Africa	Residential-coal	8.78511	10.5169	6.00477	18.4712	13.0801
10 South Africa	Residential-other fuels	0.10885	0.10222	0.09271	0.09274	0.08216
10 South Africa	Road transport - diesel	7.47099	7.12279	9.36651	13.376	15.0302
10 South Africa	Road transport - other	12.2714	10.2629	6.04513	6.51124	3.77739
10 South Africa	Non-road transport - diesel	2.43888	3.09965	2.70454	2.53197	2.57603
10 South Africa	Non-road transport - other	0.17263	0.26053	0.34355	0.20134	0.14964
10 South Africa	Other	24.7684	26.5403	30.9384	35.3889	39.5619
10 South Africa	Sum	165.888	177.297	184.739	212.42	216.232
11 Western Europe	Power - coal	2.23756	0.94859	0.74341	0.41029	0.29549
11 Western Europe	Power - other fuels	4.45163	5.38169	6.97235	5.5224	3.45802
11 Western Europe	Industry	9.52599	7.43498	5.63147	3.7289	2.83824
11 Western Europe	Coke ovens	3.89315	2.47277	1.28141	1.09195	0.75682
11 Western Europe	Fossil fuel production	0.57351	0.76958	0.49069	0.38718	0.24242
11 Western Europe	Residential-biomass	305.656	291.782	247.593	219.154	210.269
11 Western Europe	Residential-coal	40.3798	24.7591	16.323	9.81361	10.5121
11 Western Europe	Residential-other fuels	1.68189	1.7859	1.85477	1.88912	1.78842
11 Western Europe	Road transport - diesel	96.8098	123.615	84.1327	57.5976	35.3762
11 Western Europe	Road transport - other	41.303	29.2562	28.3253	26.6212	24.8547
11 Western Europe	Non-road transport - diesel	53.6642	48.2823	44.345	39.9559	30.0542
11 Western Europe	Non-road transport - other	13.8578	13.7749	10.7421	8.29422	6.77351
11 Western Europe	Other	202.764	99.4882	80.1822	64.3729	71.0933
11 Western Europe	Sum	776.798	649.751	528.617	438.839	398.313
12 Central Europe	Power - coal	2.57134	1.42353	0.81246	0.44583	0.32685
12 Central Europe	Power - other fuels	0.78033	0.43799	0.46869	0.5416	0.33939
12 Central Europe	Industry	5.5427	2.92192	1.68265	1.03903	0.77901
12 Central Europe	Coke ovens	8.0501	5.34283	3.18113	1.47814	0.71711
12 Central Europe	Fossil fuel production	0.20649	0.14327	0.12691	0.17117	0.16207
12 Central Europe	Residential-biomass	93.7907	140.984	207.51	213.79	228.579
12 Central Europe	Residential-coal	109.164	70.7681	53.5299	59.9579	74.7126
12 Central Europe	Residential-other fuels	0.15915	0.11212	0.13047	0.14546	0.11935
12 Central Europe	Road transport - diesel	14.3699	12.7004	12.3638	13.16	10.4954
12 Central Europe	Road transport - other	3.89805	2.78392	3.60214	3.44455	3.38974
12 Central Europe	Non-road transport - diesel	11.3819	8.80837	7.65298	6.39619	6.45457
12 Central Europe	Non-road transport - other	3.96224	1.807	1.54956	1.44238	1.04887
12 Central Europe	Other	83.3234	68.8799	61.1933	55.2356	50.6927
12 Central Europe	Sum	337.201	317.114	353.804	357.248	377.817
13 Turkey	Power - coal	0.22145	0.15004	0.21129	0.16498	0.24165
13 Turkey	Power - other fuels	0.02701	0.04135	0.1121	0.11459	0.10846
13 Turkey	Industry	4.63815	3.60527	2.16958	1.92217	1.83777
13 Turkey	Coke ovens	4.07392	2.75437	2.23385	1.65571	1.10422
13 Turkey	Fossil fuel production	0.05394	0.04984	0.03922	0.03275	0.03605
13 Turkey	Residential-biomass	100.256	94.3885	79.2147	63.7031	48.2797
13 Turkey	Residential-coal	32.5672	27.1381	22.8944	26.1749	60.6585
13 Turkey	Residential-other fuels	0.03199	0.03665	0.02991	0.03766	0.03588
13 Turkey	Road transport - diesel	5.87507	6.6758	4.4321	3.47224	3.35167
13 Turkey	Road transport - other	1.23638	1.61609	1.76249	1.34121	0.98928
13 Turkey	Non-road transport - diesel	3.72221	4.79903	5.0439	5.76211	7.42775
13 Turkey	Non-road transport - other	0.09914	0.01314	0.30612	0.27918	0.02431
13 Turkey	Other	29.6368	32.9541	33.8462	34.6077	35.0964
13 Turkey	Sum	182.439	174.222	152.296	139.268	159.192
14 Ukraine+	Power - coal	0.63611	0.34917	0.2195	0.19316	0.19602
14 Ukraine+	Power - other fuels	0.88573	0.38143	0.30331	0.2597	0.21964
14 Ukraine+	Industry	5.91136	2.39366	2.14881	2.04825	1.81652
14 Ukraine+	Coke ovens	19.9017	11.6898	10.9144	10.4948	8.7217
14 Ukraine+	Fossil fuel production	0.31341	0.24616	0.21749	0.25296	0.11939
14 Ukraine+	Residential-biomass	8.42806	9.43967	12.4704	13.1541	24.8066
14 Ukraine+	Residential-coal	85.1969	51.6943	28.8591	20.5145	7.62344
14 Ukraine+	Residential-other fuels	0.17888	0.06863	0.06697	0.07671	0.0757
14 Ukraine+	Road transport - diesel	9.33173	4.74562	3.67947	3.16692	3.76928
14 Ukraine+	Road transport - other	6.30848	7.74248	6.49193	6.88468	6.43719
14 Ukraine+	Non-road transport - diesel	11.5108	6.23062	4.45975	4.92422	4.37187
14 Ukraine+	Non-road transport - other	4.87805	0.04059	0.09161	0.05773	0.0237
14 Ukraine+	Other	55.2922	53.7438	53.3623	54.1917	55.6633
14 Ukraine+	Sum	208.773	148.766	123.285	116.219	113.844
15 Asia-Stan	Power - coal	0.11541	0.06331	0.05552	0.06129	0.06452
15 Asia-Stan	Power - other fuels	0.2755	0.23014	0.24526	0.31747	0.29987
15 Asia-Stan	Industry	4.33211	0.76977	0.45501	0.52482	0.67832
15 Asia-Stan	Coke ovens	0.50978	2.58589	3.14623	3.03755	3.03973
15 Asia-Stan	Fossil fuel production	1.66971	1.65282	2.71145	4.1268	2.69372
15 Asia-Stan	Residential-biomass	3.06153	2.14941	2.0129	0.45685	1.53038
15 Asia-Stan	Residential-coal	14.968	2.50986	3.03306	1.63625	28.057
15 Asia-Stan	Residential-other fuels	0.39877	0.21199	0.16026	0.1776	0.17949
15 Asia-Stan	Road transport - diesel	4.97967	1.74664	2.70504	2.52605	3.66489
15 Asia-Stan	Road transport - other	25.9885	23.2163	17.8399	19.0007	19.9144
15 Asia-Stan	Non-road transport - diesel	6.4216	4.32419	5.36281	5.03425	3.78764
15 Asia-Stan	Non-road transport - other	0	0	0.12333	0.09927	0.09796
15 Asia-Stan	Other	70.6608	58.1624	53.9073	57.2503	59.2274
15 Asia-Stan	Sum	133.381	97.6227	91.7581	94.2492	123.235
16 Russia+	Power - coal	2.39731	1.73988	1.82689	1.6747	1.05336
16 Russia+	Power - other fuels	3.0222	1.8966	1.9802	2.1093	2.00085
16 Russia+	Industry	14.8983	5.90593	4.90094	4.64253	4.86925
16 Russia+	Coke ovens	43.4178	23.0175	21.6663	20.0067	21.5719
16 Russia+	Fossil fuel production	31.2415	17.43	18.407	26.6742	16.1534
16 Russia+	Residential-biomass	151.461	84.5149	63.4027	35.6328	30.0266
16 Russia+	Residential-coal	163.293	94.1225	83.1429	27.8962	15.7685
16 Russia+	Residential-other fuels	0.54126	0.34275	0.29451	0.23672	0.23885
16 Russia+	Road transport - diesel	34.7191	11.9886	17.8781	17.8627	16.821
16 Russia+	Road transport - other	79.5289	64.5067	58.68	68.2446	66.3684
16 Russia+	Non-road transport - diesel	46.7012	24.0499	16.0736	13.1247	10.7615
16 Russia+	Non-road transport - other	6.96827	1.93981	1.31706	1.11468	0.54418
16 Russia+	Other	167.806	165.003	163.897	163.912	163.77
16 Russia+	Sum	745.996	496.458	453.467	383.132	349.948
17 Middle East	Power - coal	0.01068	0.01701	0.0207	0.0177	0.0098
17 Middle East	Power - other fuels	1.85363	2.41155	3.41048	4.90069	8.77314
17 Middle East	Industry	9.30323	9.54744	8.98624	6.89996	6.50216
17 Middle East	Coke ovens	1.14114	1.56798	1.54439	1.15741	1.3187
17 Middle East	Fossil fuel production	12.7168	11.0072	13.5907	13.3788	13.2235
17 Middle East	Residential-biomass	8.22571	10.737	8.85818	16.8496	14.8074
17 Middle East	Residential-coal	0	0.15775	0.1536	0.07362	0.07259
17 Middle East	Residential-other fuels	0.14859	0.2077	0.24659	0.28656	0.26991
17 Middle East	Road transport - diesel	64.6965	75.0136	80.636	85.8582	78.2508
17 Middle East	Road transport - other	72.1013	88.0079	78.5951	80.5583	67.2115
17 Middle East	Non-road transport - diesel	14.4514	14.9727	17.1783	20.5529	22.5287
17 Middle East	Non-road transport - other	0.72013	0.48501	0.60823	0.4303	0.36307
17 Middle East	Other	79.6364	89.0005	93.2512	100.966	109.076
17 Middle East	Sum	265.005	303.133	307.08	331.93	322.407
18 India	Power - coal	1.46796	2.3897	2.822	2.75275	2.82074
18 India	Power - other fuels	2.20531	3.48694	5.57891	5.63094	7.99164
18 India	Industry	50.1793	58.029	64.5517	57.4276	60.0519
18 India	Coke ovens	11.1828	11.8578	10.1953	14.7158	22.0958
18 India	Fossil fuel production	0.45766	0.50977	0.43686	0.37746	0.37678
18 India	Residential-biomass	1889.45	1981.4	1878.73	2011.31	2163.09
18 India	Residential-coal	51.2017	53.5183	37.7728	43.2402	69.9269
18 India	Residential-other fuels	13.1666	15.2989	13.2911	7.94782	6.16894
18 India	Road transport - diesel	49.1826	75.7244	66.8945	66.4119	98.2479
18 India	Road transport - other	96.6471	93.9359	96.8474	48.2986	29.1264
18 India	Non-road transport - diesel	5.69846	6.9752	14.4577	14.9061	17.7479
18 India	Non-road transport - other	0.96756	0.63965	0.03186	0.03186	0.0672
18 India	Other	447.045	463.665	508.251	500.597	502.259
18 India	Sum	2618.85	2767.44	2699.86	2773.64	2979.97
19 Korea	Power - coal	0.49847	0.40536	0.28911	0.34744	0.27827
19 Korea	Power - other fuels	0.18025	0.26354	0.46333	0.55047	0.61738
19 Korea	Industry	3.49896	2.72403	2.67396	2.20587	1.89907
19 Korea	Coke ovens	11.7381	2.15292	2.46919	2.23923	2.29817
19 Korea	Fossil fuel production	0	0	0	0	0
19 Korea	Residential-biomass	152.268	159.2	159.164	162.151	158.119
19 Korea	Residential-coal	75.1692	11.8898	4.90792	23.3832	21.046
19 Korea	Residential-other fuels	0.45966	0.43718	0.42634	0.5005	0.50453
19 Korea	Road transport - diesel	18.2165	25.0288	17.1539	12.9657	6.89292
19 Korea	Road transport - other	4.90966	4.977	5.04918	5.08779	4.39366
19 Korea	Non-road transport - diesel	3.89521	6.34415	6.31958	2.66362	2.08936
19 Korea	Non-road transport - other	0.31934	0.59334	0.81864	0.68233	0.78543
19 Korea	Other	28.7767	31.9832	34.014	35.0581	36.0438
19 Korea	Sum	299.93	245.999	233.749	247.836	234.968
20 China+	Power - coal	11.802	12.723	10.6054	7.14149	5.43362
20 China+	Power - other fuels	2.56122	3.65848	5.28211	7.47444	12.5111
20 China+	Industry	84.2054	149.494	142.044	184.878	201.16
20 China+	Coke ovens	114.57	178.095	240.624	417.891	480.137
20 China+	Fossil fuel production	0.83199	0.8763	1.10859	1.31291	0.94127
20 China+	Residential-biomass	3551.76	3594.69	3545.47	3251.18	3121.34
20 China+	Residential-coal	601.381	512.56	767.39	794.373	839.966
20 China+	Residential-other fuels	1.10699	1.69456	2.53916	3.97539	6.81789
20 China+	Road transport - diesel	13.8587	21.5005	76.4703	114.757	153.808
20 China+	Road transport - other	58.6233	89.0902	103.925	97.1064	70.2125
20 China+	Non-road transport - diesel	35.1791	43.6801	32.3844	51.4911	52.7925
20 China+	Non-road transport - other	1.7166	2.25647	1.54682	2.4927	2.75307
20 China+	Other	753.893	788.536	749.235	739.365	734.608
20 China+	Sum	5231.49	5398.86	5678.63	5673.44	5682.48
21 Southeastern Asia	Power - coal	0.65947	0.85321	0.9512	0.97373	0.95784
21 Southeastern Asia	Power - other fuels	0.86408	1.36667	1.84006	1.34883	1.4771
21 Southeastern Asia	Industry	21.9748	30.7911	29.1677	23.1366	23.0523
21 Southeastern Asia	Coke ovens	0	0	0	0	0
21 Southeastern Asia	Fossil fuel production	0.78802	0.93821	1.07212	1.2742	1.1356
21 Southeastern Asia	Residential-biomass	666.534	632.963	647.304	671.726	701.098
21 Southeastern Asia	Residential-coal	1.92662	3.25588	3.7657	5.90686	7.36356
21 Southeastern Asia	Residential-other fuels	1.39879	1.21586	1.27371	1.19884	0.95099
21 Southeastern Asia	Road transport - diesel	32.1584	52.2153	56.8324	67.1374	63.4558
21 Southeastern Asia	Road transport - other	18.8131	27.4482	29.7376	31.7843	46.5102
21 Southeastern Asia	Non-road transport - diesel	7.76393	9.87367	13.5113	16.0848	18.1845
21 Southeastern Asia	Non-road transport - other	0.24348	0.46565	0.5722	1.04529	0.85572
21 Southeastern Asia	Other	137.429	151.542	158.339	173.291	185.2
21 Southeastern Asia	Sum	890.554	912.928	944.367	994.908	1050.24
22 Indonesia+	Power - coal	0.0347	0.03926	0.07432	0.09409	0.12043
22 Indonesia+	Power - other fuels	0.95401	1.57384	2.10036	3.70384	4.20725
22 Indonesia+	Industry	10.3086	12.0747	11.7203	8.16211	7.61793
22 Indonesia+	Coke ovens	0	0	0	0	0
22 Indonesia+	Fossil fuel production	1.78855	2.114	1.87927	1.25574	0.96832
22 Indonesia+	Residential-biomass	594.664	635.11	676.507	729.065	776.405
22 Indonesia+	Residential-coal	0.04274	0.1463	0.15089	0.13574	0.13242
22 Indonesia+	Residential-other fuels	0.81955	0.83218	0.86241	0.86332	0.8141
22 Indonesia+	Road transport - diesel	14.0326	20.9185	27.5659	22.8609	35.0862
22 Indonesia+	Road transport - other	7.47632	11.7508	15.4139	19.8556	25.1737
22 Indonesia+	Non-road transport - diesel	3.85467	5.70521	7.94743	9.65878	9.99054
22 Indonesia+	Non-road transport - other	0.21287	0.44433	0.55043	0.51704	0.16563
22 Indonesia+	Other	112.584	123.747	137.356	150.544	159.667
22 Indonesia+	Sum	746.773	814.456	882.128	946.716	1020.35
23 Japan	Power - coal	0.073	0.04604	0.01243	0.00743	0.0054
23 Japan	Power - other fuels	0.88326	0.78436	1.09862	1.6442	1.75344
23 Japan	Industry	0.92651	0.65788	0.46202	0.39725	0.33786
23 Japan	Coke ovens	1.2872	1.0205	0.84612	0.72083	0.75078
23 Japan	Fossil fuel production	0.00046	0.00047	0.00032	0.00031	0.00024
23 Japan	Residential-biomass	1.76332	1.23028	0.7426	0.36243	0.34779
23 Japan	Residential-coal	0.42346	0.23727	0.02784	0.0243	0.02348
23 Japan	Residential-other fuels	0.52092	0.59693	0.61282	0.62096	0.4896
23 Japan	Road transport - diesel	24.9719	28.7968	21.3323	13.8988	7.84731
23 Japan	Road transport - other	12.0197	11.8649	12.9136	10.2113	6.94338
23 Japan	Non-road transport - diesel	8.86726	9.50745	11.018	9.27505	5.07068
23 Japan	Non-road transport - other	2.75941	3.05389	2.29811	1.60734	0.96467
23 Japan	Other	13.6357	13.5499	14.3046	14.3498	14.7534
23 Japan	Sum	68.1321	71.3466	65.6693	53.1199	39.288
24 Oceania	Power - coal	0.09911	0.09527	0.09568	0.10475	0.08768
24 Oceania	Power - other fuels	0.02981	0.02895	0.04194	0.06631	0.1193
24 Oceania	Industry	0.29081	0.29194	0.25261	0.21374	0.17417
24 Oceania	Coke ovens	1.02588	0.23234	0.10822	0.10594	0.10801
24 Oceania	Fossil fuel production	0.26124	0.17819	0.09246	0.07141	0.05915
24 Oceania	Residential-biomass	39.1519	41.0287	37.6743	27.7376	24.4124
24 Oceania	Residential-coal	0.81995	0.40812	0.32467	0.28629	0.20514
24 Oceania	Residential-other fuels	0.02035	0.02171	0.02199	0.02482	0.02631
24 Oceania	Road transport - diesel	7.86397	7.49448	7.22066	5.81961	5.17488
24 Oceania	Road transport - other	5.2589	4.83614	4.35668	4.00932	3.46538
24 Oceania	Non-road transport - diesel	4.382	4.89853	5.72305	6.90811	6.77703
24 Oceania	Non-road transport - other	0.1408	0.12477	0.12467	0.24541	0.24628
24 Oceania	Other	24.9916	30.629	38.9862	37.4177	34.9388
24 Oceania	Sum	84.3364	90.2681	95.023	83.011	75.7946
25 Rest South Asia	Power - coal	0	0	0.00093	0.0014	0.00245
25 Rest South Asia	Power - other fuels	0.50415	0.79038	1.36583	1.97374	2.41385
25 Rest South Asia	Industry	9.79108	11.1229	13.7542	14.5379	15.045
25 Rest South Asia	Coke ovens	0.76527	0.61868	0.52169	0.50591	0.49984
25 Rest South Asia	Fossil fuel production	0.11843	0.15009	0.17667	0.20576	0.26404
25 Rest South Asia	Residential-biomass	687.264	747.353	835.111	905.191	958.674
25 Rest South Asia	Residential-coal	0.32582	0.10863	0.16011	0.19491	0.25651
25 Rest South Asia	Residential-other fuels	3.85723	3.17914	3.29414	3.08065	2.56912
25 Rest South Asia	Road transport - diesel	14.0297	21.553	28.8721	30.2013	34.1139
25 Rest South Asia	Road transport - other	33.4488	32.3499	26.652	28.047	39.4257
25 Rest South Asia	Non-road transport - diesel	2.56585	3.34963	3.71642	4.40253	3.69269
25 Rest South Asia	Non-road transport - other	0	0.05457	0.06034	0.15256	0.26734
25 Rest South Asia	Other	108.253	144.59	163.705	178.554	187.39
25 Rest South Asia	Sum	860.924	965.22	1077.39	1167.05	1244.61
Global	Power - coal	24.2286	22.6969	19.6498	15.1395	12.3848
Global	Power - other fuels	25.8586	29.9192	39.699	47.4255	64.2799
Global	Industry	319.247	385.437	384.106	406.659	430.291
Global	Coke ovens	253.189	268.739	318.854	491.336	563.701
Global	Fossil fuel production	71.4897	60.639	64.3862	70.5245	54.3093
Global	Residential-biomass	11867.7	12349.3	12690.6	13086	13713.1
Global	Residential-coal	1236.12	897.794	1058.94	1057.55	1176.7
Global	Residential-other fuels	32.3655	34.2019	34.2174	30.4422	30.9906
Global	Road transport - diesel	636.252	764.365	794.071	806.267	840.921
Global	Road transport - other	781.616	805.919	742.707	689.22	618.846
Global	Non-road transport - diesel	313.631	286.422	282.994	309.758	305.217
Global	Non-road transport - other	60.4034	41.8567	37.7194	40.9397	32.0811
Global	Other	3207.2	3339.93	3513.98	3652.72	3747.27
Global	Total	18829.3	19287.2	19981.9	20704	21590.1
