# Supplementary material for: Global anthropogenic emissions of particulate matter including black carbon
Source: Copernicus journal article supplement (doi:10.5194/acp-17-8681-2017), 2017-07-17
Supplement: Supplementary file 2 [file GAINS-regions.xlsx]

## Sheet: Sheet2
No	Country/Region	Comment
1	Afghanistan (Islamic Republic of)
2	Albania
3	Argentina
4	Armenia
5	Australia
6	Austria
7	Azerbaijan
8	Bangladesh, Bangladesh Dhaka
9	Bangladesh, Bangladesh Rest of Bangladesh
10	Belarus
11	Belgium
12	Bhutan
13	Bolivia	Prior to version V5a of ECLIPSE included as 'Other Latin America'
14	Bosnia and Herzegovina
15	Brazil
16	Brunei
17	Bulgaria
18	Cambodia
19	Canada
20	Caribbean	Prior to version V5a of ECLIPSE included as 'Other Latin America'
21	Central America	Prior to version V5a of ECLIPSE included as 'Other Latin America'
22	Chile
23	China, China Anhui
24	China, China Beijing
25	China, China Chongqing
26	China, China Fujian
27	China, China Gansu
28	China, China Guangdong
29	China, China Guangxi
30	China, China Guizhou
31	China, China Hainan
32	China, China Hebei
33	China, China Heilongjiang
34	China, China Henan
35	China, China Hong Kong & Macau
36	China, China Hubei
37	China, China Hunan
38	China, China Inner Mongolia
39	China, China Jiangsu
40	China, China Jiangxi
41	China, China Jilin
42	China, China Liaoning
43	China, China Ningxia
44	China, China Qinghai
45	China, China Shaanxi
46	China, China Shandong
47	China, China Shanghai
48	China, China Shanxi
49	China, China Sichuan
50	China, China Tianjin
51	China, China Tibet (Xizang)
52	China, China Xinjiang
53	China, China Yunnan
54	China, China Zhejiang
55	Colombia	Prior to version V5a of ECLIPSE included as 'Other Latin America'
56	Croatia
57	Cyprus
58	Czech Republic
59	Denmark
60	Ecuador	Prior to version V5a of ECLIPSE included as 'Other Latin America'
61	Egypt
62	Estonia
63	Finland
64	France
65	Georgia
66	Germany
67	Greece
68	Hungary
69	Iceland
70	India, India Andhra Pradesh
71	India, India Assam
72	India, India Bihar
73	India, India Chhattisgarh
74	India, India Delhi
75	India, India Goa
76	India, India Gujarat
77	India, India Haryana
78	India, India Himachal Pradesh
79	India, India Jammu and Kashmir
80	India, India Jharkhand
81	India, India Karnataka
82	India, India Kerala
83	India, India Madhya Pradesh
84	India, India Maharashtra-Dadra-Nagar Haveli-Daman-Diu
85	India, India North East (excl. Assam)
86	India, India Orissa
87	India, India Punjab (I)
88	India, India Rajasthan
89	India, India Tamil Nadu
90	India, India Uttar Pradesh
91	India, India Uttaranchal
92	India, India West Bengal
93	Indonesia, Indonesia Jakarta
94	Indonesia, Indonesia Java
95	Indonesia, Indonesia Rest of Indonesia
96	Indonesia, Indonesia Sumatra
97	Ireland
98	Islamic Republic of Iran	In ECLIPSE calculation part of 'Middle East'
99	Israel
100	Italy
101	Japan, Japan Chubu
102	Japan, Japan Chugoku-Shikoku
103	Japan, Japan Hokkaido-Tohoku
104	Japan, Japan Kanto
105	Japan, Japan Kinki
106	Japan, Japan Kyushu-Okinawa
107	Kazakhstan
108	Kingdom of Saudi Arabia	In ECLIPSE calculation part of 'Middle East'
109	Korea (North)
110	Korea (South), Korea (South) North
111	Korea (South), Korea (South) Pusan
112	Korea (South), Korea (South) Seoul-Inchon
113	Korea (South), Korea (South) South
114	Kosovo	Prior to version V5a of ECLIPSE included as a total of 'Serbia, Montenegro, Kosovo'
115	Kyrgyzstan
116	Laos
117	Latvia
118	Lithuania
119	Luxembourg
120	Macedonia
121	Malaysia, Malaysia Kuala Lumpur
122	Malaysia, Malaysia Peninsular Malaysia
123	Malaysia, Malaysia Sarawak-Sabah
124	Malta
125	Mexico
126	Middle East
127	Mongolia
128	Montenegro	Prior to version V5a of ECLIPSE included as a total of 'Serbia, Montenegro, Kosovo'
129	Myanmar
130	Nepal
131	Netherlands
132	New Zealand
133	North Africa: Libya, Tunisia, Algeria, Sudan, Marocco
134	Norway
135	Other Africa
136	Other Former USSR, Asia
137	Pakistan, Pakistan Karachi
138	Pakistan, Pakistan NW Frontier Provinces-Baluchistan
139	Pakistan, Pakistan Punjab (P)
140	Pakistan, Pakistan Sind
141	Paraguay	Prior to version V5a of ECLIPSE included as 'Other Latin America'
142	Peru	Prior to version V5a of ECLIPSE included as 'Other Latin America'
143	Philippines, Philippines Bicol-Visayas-Mindanao
144	Philippines, Philippines Luzon
145	Philippines, Philippines Metro Manila
146	Poland
147	Portugal
148	Republic of Moldova
149	Republic of South Africa
150	Romania
151	Russia, Russia Asian part
152	Russia, Russia European part
153	Serbia	Prior to version V5a of ECLIPSE included as a total of 'Serbia, Montenegro, Kosovo'
154	Singapore
155	Slovak Republic
156	Slovenia
157	Spain
158	Sri Lanka
159	Sweden
160	Switzerland
161	Taiwan
162	Thailand, Thailand Bangkok Metropolitan Region
163	Thailand, Thailand Central Valley
164	Thailand, Thailand N Highlands
165	Thailand, Thailand NE Plateau
166	Thailand, Thailand S Peninsula
167	Turkey
168	Ukraine
169	United Kingdom
170	United States of America
171	Uruguay	Prior to version V5a of ECLIPSE included as 'Other Latin America'
172	Venezuela	Prior to version V5a of ECLIPSE included as 'Other Latin America'
173	Vietnam, Northern Vietnam: Red River Delta-Hanoi
174	Vietnam, Southern Vietnam: Mekong River Delta-Ho Chi Minh City
